# Supplementary material for: DFT insights into electrocatalytic CO2 reduction to methanol on α-Fe2O3(0001) surfaces
Source: Royal Society of Chemistry journal article supplement (doi:10.1039/c9cp06453b), 2020-01-01
Supplement: c9cp06453b1.pdf [file c9cp06453b1.pdf]

**Supporting Information:**

**DFT insights into Electrocatalytic CO<sub>2</sub> Reduction  
to Methanol on  $\alpha$ -Fe<sub>2</sub>O<sub>3</sub>(0001) Surface**

Nandha Kumar,\* Nicola Seriani, and Ralph Gebauer

*The Abdus Salam International Centre for Theoretical Physics, Strada Costiera 11, 34151  
Trieste, Italy.*

E-mail: nvelanka@ictp.it

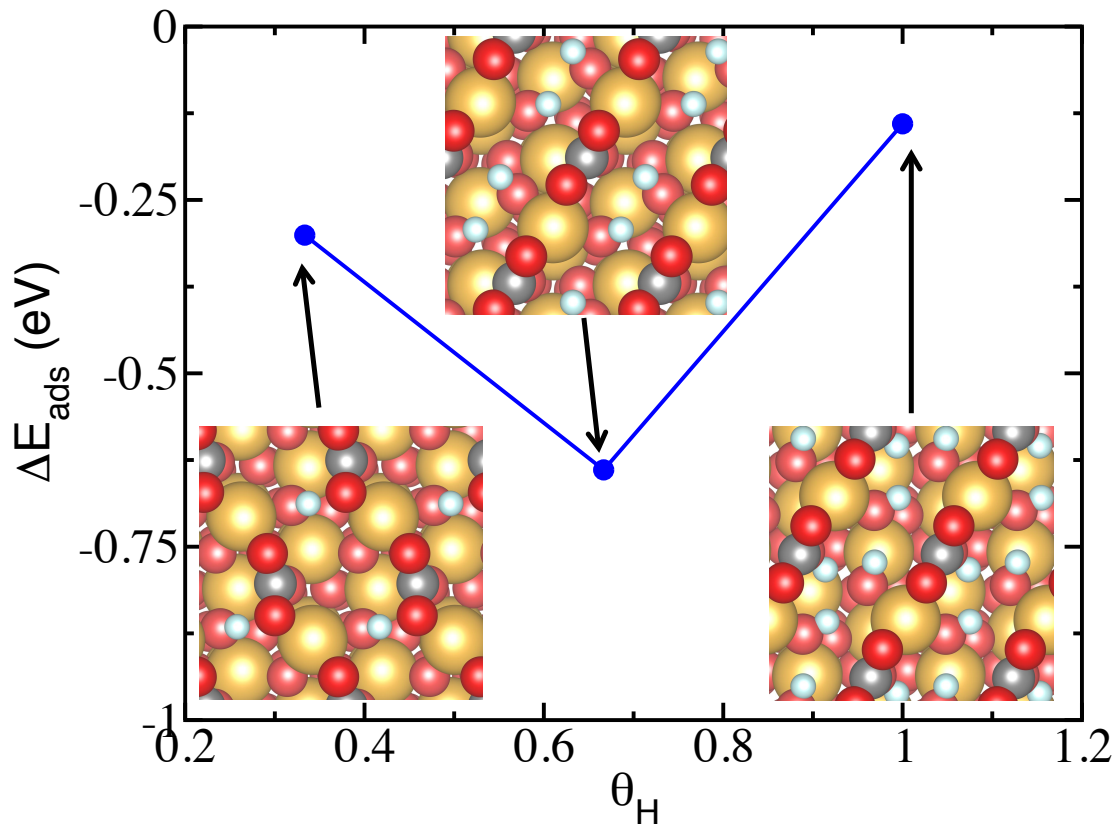

Figure S1: Adsorption energy of  $\text{CO}_2$  for various surface H coverages. Top view of the geometries are also given. Fe, O, C and H atoms are respectively represented by orange, red, grey and cyan colour balls. For clear visualisation the surface atoms are represented with reduced brightness.

Table S1: Distinct reaction steps and their reaction energies ( $\Delta E$ ) at  $U = 0$  V.

| Index | Reaction step                                                                                                                                                          | $\Delta E$ (eV) |
|-------|------------------------------------------------------------------------------------------------------------------------------------------------------------------------|-----------------|
| 1     | 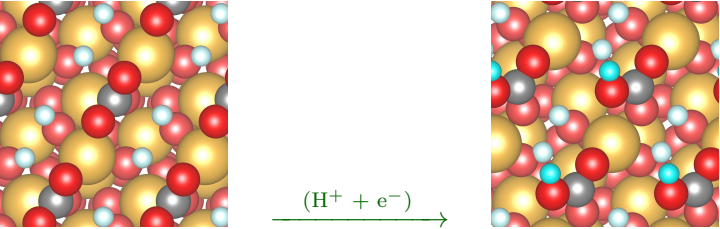<br>$\text{*CO}_2 \xrightarrow{(\text{H}^+ + \text{e}^-)} \text{*COOH}$              | -0.76           |
| 2     | <br>$\text{*CO}_2 \xrightarrow{(\text{H}^+ + \text{e}^-)} \text{*HCOO}$              | 0.18            |
| 3     | <br>$\text{*CO}_2 \xrightarrow{(\text{H}^+ + \text{e}^-)} \text{*CHO} + \text{*O}$ | -0.18           |
| 4     | <br>$\text{*CO}_2 \xrightarrow{(\text{H}^+ + \text{e}^-)} \text{*CO} + \text{*OH}$ | 1.20            |

*Continued on next page*

Table S1 – *Continued from previous page*

| Index | Reaction step                                                                                                                                                                   | $\Delta E$ (eV) |
|-------|---------------------------------------------------------------------------------------------------------------------------------------------------------------------------------|-----------------|
| 5     | 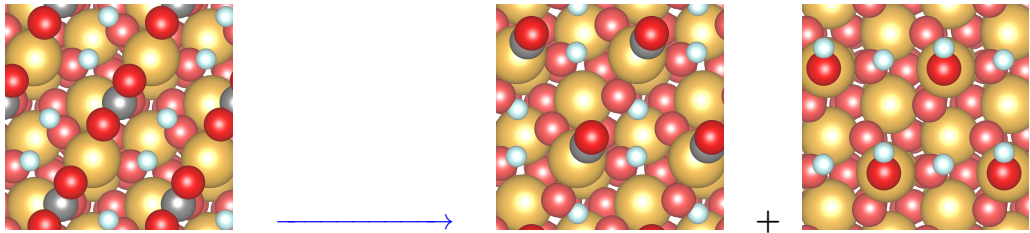<br>$\text{*CO}_2 \longrightarrow \text{*CO} + \text{*O}$                                     | 1.73            |
| 6     | <br>$\text{*COOH} \xrightarrow{(\text{H}^+ + \text{e}^-)} \text{*HCOOH}$                      | 0.95            |
| 7     | <br>$\text{*COOH} \xrightarrow{(\text{H}^+ + \text{e}^-)} \text{*COHOH}$                    | 1.22            |
| 8     | <br>$\text{*COOH} \xrightarrow{(\text{H}^+ + \text{e}^-)} \text{*CO} + \text{*H}_2\text{O}$ | 1.05            |

*Continued on next page*

Table S1 – *Continued from previous page*

| Index | Reaction step                                                                                |                             |                                                                                                                                                                                                     | $\Delta E$ (eV) |
|-------|----------------------------------------------------------------------------------------------|-----------------------------|-----------------------------------------------------------------------------------------------------------------------------------------------------------------------------------------------------|-----------------|
| 9     | 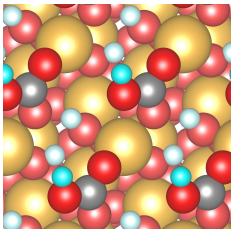<br>*COOH   | $\xrightarrow{(H^+ + e^-)}$ | <br>*CHO         + <br>*OH     | 0.04            |
| 10    | <br>*COOH   | $\xrightarrow{(H^+ + e^-)}$ | <br>*COH         + <br>*OH     | 1.52            |
| 11    | <br>*COOH | $\xrightarrow{(H^+ + e^-)}$ | <br>*HCOH         + <br>*O | 2.36            |
| 12    | <br>*COOH | $\longrightarrow$           | <br>*CO         + <br>*OH  | 1.96            |

*Continued on next page*



Table S1 – *Continued from previous page*

| Index | Reaction step                                                                                                                                                           | $\Delta E$ (eV) |
|-------|-------------------------------------------------------------------------------------------------------------------------------------------------------------------------|-----------------|
| 13    | 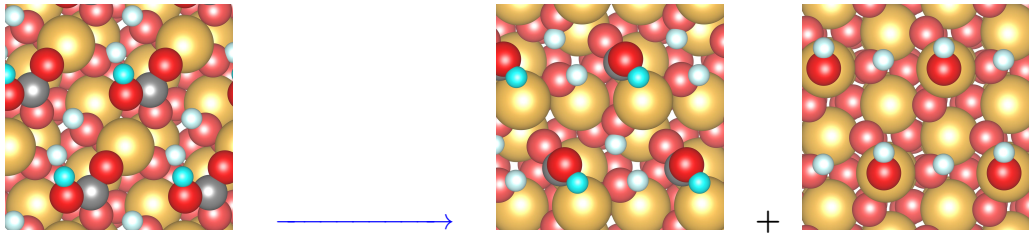<br>$\text{*COOH} \longrightarrow \text{*COH} + \text{*O}$                            | 2.06            |
| 14    | <br>$\text{*HCOO} \xrightarrow{(\text{H}^+ + \text{e}^-)} \text{*HCOOH}$              | 0.01            |
| 15    | <br>$\text{*HCOO} \xrightarrow{(\text{H}^+ + \text{e}^-)} \text{*OCH}_2\text{O}$    | 1.01            |
| 16    | <br>$\text{*HCOO} \xrightarrow{(\text{H}^+ + \text{e}^-)} \text{*CHO} + \text{*OH}$ | -0.90           |

*Continued on next page*

Table S1 – *Continued from previous page*

| Index | Reaction step                                                                                                                                                                                                                      | $\Delta E$ (eV) |
|-------|------------------------------------------------------------------------------------------------------------------------------------------------------------------------------------------------------------------------------------|-----------------|
| 17    |  <p><math>\xrightarrow{(H^+ + e^-)}</math></p> <p>*HCOO                      *CH<sub>2</sub>O                      +                      *O</p> | 0.45            |
| 18    |  <p><math>\longrightarrow</math></p> <p>*HCOO                      *CHO                      +                      *O</p>                      | -0.36           |
| 19    |  <p><math>\xrightarrow{(H^+ + e^-)}</math></p> <p>*HCOOH                      *OCH<sub>2</sub>OH</p>                                           | -0.13           |
| 20    |  <p><math>\xrightarrow{(H^+ + e^-)}</math></p> <p>*HCOOH                      *HCOHOH</p>                                                      | 1.05            |

*Continued on next page*

Table S1 – *Continued from previous page*

| Index | Reaction step                                                                                 |                             |                                                                                                                                                                                                                             | $\Delta E$ (eV) |
|-------|-----------------------------------------------------------------------------------------------|-----------------------------|-----------------------------------------------------------------------------------------------------------------------------------------------------------------------------------------------------------------------------|-----------------|
| 21    | <br>*HCOOH   | $\xrightarrow{(H^+ + e^-)}$ |  + <br>*CHO                      *H <sub>2</sub> O     | -1.82           |
| 22    | <br>*HCOOH   | $\xrightarrow{(H^+ + e^-)}$ |  + <br>*CH <sub>2</sub> O                      *OH     | -0.09           |
| 23    | <br>*HCOOH | $\xrightarrow{(H^+ + e^-)}$ |  + <br>*HCOH                      *OH              | 0.87            |
| 24    | <br>*HCOOH | $\xrightarrow{(H^+ + e^-)}$ |  + <br>*CH <sub>2</sub> OH                      *O | -0.16           |

*Continued on next page*



Table S1 – Continued from previous page

| Index | Reaction step                                                                                                                                                                                 | $\Delta E$ (eV) |
|-------|-----------------------------------------------------------------------------------------------------------------------------------------------------------------------------------------------|-----------------|
| 25    | 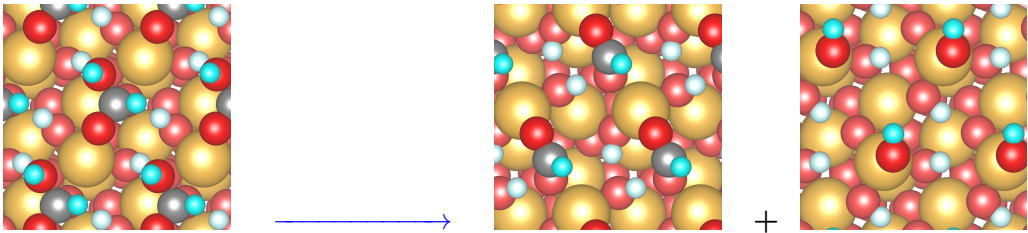 <p><chem>*HCOOH</chem> <math>\longrightarrow</math> <chem>*CHO</chem> + <chem>*OH</chem></p>               | -0.91           |
| 26    |  <p><chem>*HCOOH</chem> <math>\longrightarrow</math> <chem>*HCOH</chem> + <chem>*O</chem></p>               | 1.41            |
| 27    |  <p><chem>*COHOH</chem> <math>\xrightarrow{(H^+ + e^-)}</math> <chem>*HCOHOH</chem></p>                   | 0.78            |
| 28    |  <p><chem>*COHOH</chem> <math>\xrightarrow{(H^+ + e^-)}</math> <chem>*COH</chem> + <chem>*H_2O</chem></p> | -0.61           |

Continued on next page

Table S1 – *Continued from previous page*

| Index | Reaction step                                                                                                                                                                  | $\Delta E$ (eV) |
|-------|--------------------------------------------------------------------------------------------------------------------------------------------------------------------------------|-----------------|
| 29    | 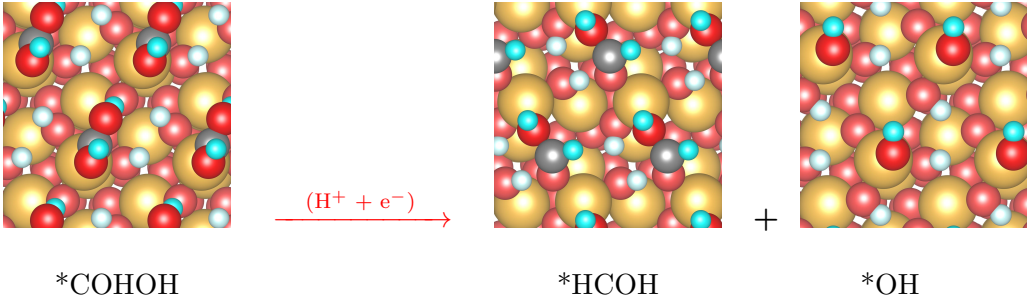<br>$\text{*COHOH} \xrightarrow{(\text{H}^+ + \text{e}^-)} \text{*HCOH} + \text{*OH}$        | 0.60            |
| 30    | <br>$\text{*COHOH} \longrightarrow \text{*CO} + \text{*H}_2\text{O}$                        | -0.17           |
| 31    | <br>$\text{*COHOH} \longrightarrow \text{*COH} + \text{*OH}$                               | 0.30            |
| 32    | <br>$\text{*OCH}_2\text{O} \xrightarrow{(\text{H}^+ + \text{e}^-)} \text{*OCH}_2\text{OH}$ | -1.14           |

*Continued on next page*

Table S1 – Continued from previous page

| Index | Reaction step                                                                                                                                                                                          | $\Delta E$ (eV) |
|-------|--------------------------------------------------------------------------------------------------------------------------------------------------------------------------------------------------------|-----------------|
| 33    | 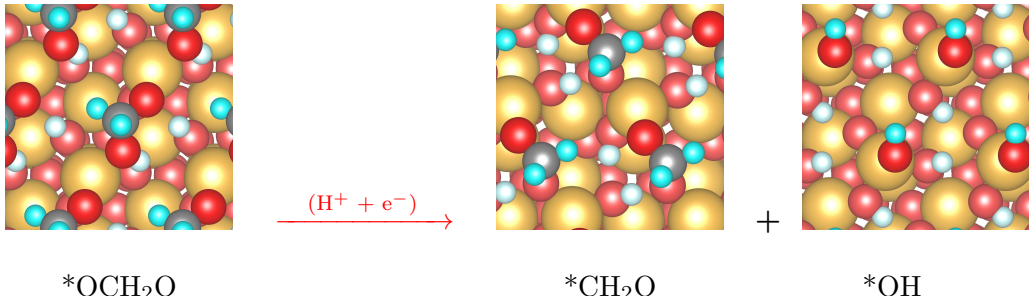 <p><math>\text{*OCH}_2\text{O} \xrightarrow{(\text{H}^+ + \text{e}^-)} \text{*CH}_2\text{O} + \text{*OH}</math></p> | -1.10           |
| 34    |  <p><math>\text{*OCH}_2\text{O} \xrightarrow{(\text{H}^+ + \text{e}^-)} \text{*CH}_3\text{O} + \text{*O}</math></p> | -0.72           |
| 35    |  <p><math>\text{*OCH}_2\text{O} \longrightarrow \text{*CH}_2\text{O} + \text{*O}</math></p>                        | -0.56           |
| 36    |  <p><math>\text{*OCH}_2\text{OH} \xrightarrow{(\text{H}^+ + \text{e}^-)} \text{*HOCH}_2\text{OH}</math></p>        | -0.59           |

Continued on next page



Table S1 – *Continued from previous page*

| Index | Reaction step                                                                                               |                             |                                                                                                                                                                                                                    | $\Delta E$ (eV) |
|-------|-------------------------------------------------------------------------------------------------------------|-----------------------------|--------------------------------------------------------------------------------------------------------------------------------------------------------------------------------------------------------------------|-----------------|
| 37    | <br>*OCH <sub>2</sub> OH   | $\xrightarrow{(H^+ + e^-)}$ |  + <br>*CH <sub>2</sub> O + *H <sub>2</sub> O | -0.87           |
| 38    | <br>*OCH <sub>2</sub> OH   | $\xrightarrow{(H^+ + e^-)}$ |  + <br>*CH <sub>3</sub> O + *OH               | -0.12           |
| 39    | <br>*OCH <sub>2</sub> OH | $\xrightarrow{(H^+ + e^-)}$ |  + <br>*CH <sub>2</sub> OH + *OH          | -0.56           |
| 40    | <br>*OCH <sub>2</sub> OH | $\xrightarrow{(H^+ + e^-)}$ |  + <br>*CH <sub>3</sub> OH + *O           | -0.46           |

*Continued on next page*



Table S1 – *Continued from previous page*

| Index | Reaction step                                                                                                                             | $\Delta E$ (eV) |
|-------|-------------------------------------------------------------------------------------------------------------------------------------------|-----------------|
| 41    | 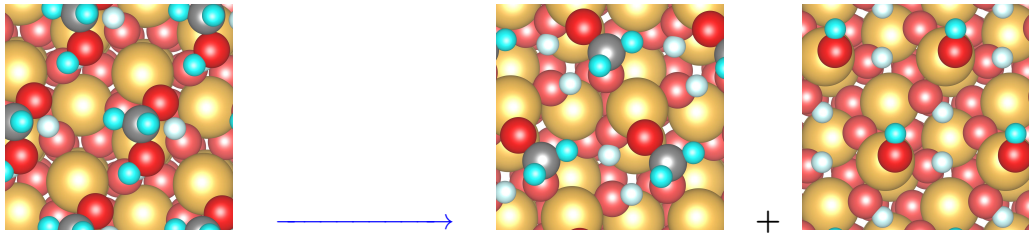<br>$*OCH_2OH \longrightarrow *CH_2O + *OH$             | 0.04            |
| 42    | <br>$*OCH_2OH \longrightarrow *CH_2OH + *O$             | -0.03           |
| 43    | <br>$*HCOHOH \xrightarrow{(H^+ + e^-)} *HOCH_2OH$     | -1.78           |
| 44    | <br>$*HCOHOH \xrightarrow{(H^+ + e^-)} *HCOH + *H_2O$ | -1.09           |

*Continued on next page*

Table S1 – *Continued from previous page*

| Index | Reaction step                                                                                      |                             |                                                                                                                                                                                                   | $\Delta E$ (eV) |
|-------|----------------------------------------------------------------------------------------------------|-----------------------------|---------------------------------------------------------------------------------------------------------------------------------------------------------------------------------------------------|-----------------|
| 45    | 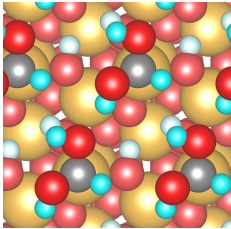<br>$*HCOHOH$     | $\xrightarrow{(H^+ + e^-)}$ |  + <br>$*CH_2OH$ $*OH$       | -1.09           |
| 46    | <br>$*HCOHOH$     | $\longrightarrow$           |  + <br>$*CHO$ $*H_2O$        | -2.86           |
| 47    | <br>$*HCOHOH$   | $\longrightarrow$           |  + <br>$*HCOH$ $*OH$     | -0.18           |
| 48    | <br>$*HOCH_2OH$ | $\xrightarrow{(H^+ + e^-)}$ |  + <br>$*CH_2OH$ $*H_2O$ | -0.88           |

*Continued on next page*

Table S1 – *Continued from previous page*

| Index | Reaction step                                                                                                                                                                                                                                                                                                         | $\Delta E$ (eV) |
|-------|-----------------------------------------------------------------------------------------------------------------------------------------------------------------------------------------------------------------------------------------------------------------------------------------------------------------------|-----------------|
| 49    | 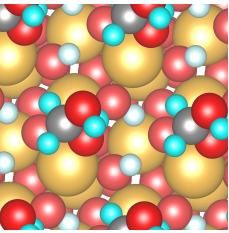 $\xrightarrow{(H^+ + e^-)}$  + <br>$*HOCH_2OH$ $*CH_3OH$ $*OH$ | -0.40           |
| 50    |  $\longrightarrow$  + <br>$*HOCH_2OH$ $*CH_2O$ $*H_2O$          | -0.28           |
| 51    |  $\longrightarrow$  + <br>$*HOCH_2OH$ $*CH_2OH$ $*OH$     | 0.03            |
| 52    |  $\xrightarrow{(H^+ + e^-)}$ <br>$*CO$ $*CHO$                                                                                                  | -1.91           |

*Continued on next page*

Table S1 – *Continued from previous page*

| Index | Reaction step                                                                                                                                                                                                                                                                                                                                                                                                                         | $\Delta E$ (eV) |
|-------|---------------------------------------------------------------------------------------------------------------------------------------------------------------------------------------------------------------------------------------------------------------------------------------------------------------------------------------------------------------------------------------------------------------------------------------|-----------------|
| 53    |  <p>The reaction shows a CO molecule (red and grey spheres) adsorbed on a gold surface (yellow spheres). It reacts with a proton and an electron (<math>H^+ + e^-</math>) to form a COH species (red, grey, and cyan spheres) also adsorbed on the surface.</p> <p style="text-align: center;"><math>*CO \xrightarrow{(H^+ + e^-)} *COH</math></p>  | -0.44           |
| 54    |  <p>The reaction shows a CHO species (red, grey, and cyan spheres) adsorbed on a gold surface. It reacts with a proton and an electron (<math>H^+ + e^-</math>) to form a CH<sub>2</sub>O species (red, grey, and cyan spheres) adsorbed on the surface.</p> <p style="text-align: center;"><math>*CHO \xrightarrow{(H^+ + e^-)} *CH_2O</math></p> | 0.81            |
| 55    |  <p>The reaction shows a CHO species (red, grey, and cyan spheres) adsorbed on a gold surface. It reacts with a proton and an electron (<math>H^+ + e^-</math>) to form an HCOH species (red, grey, and cyan spheres) adsorbed on the surface.</p> <p style="text-align: center;"><math>*CHO \xrightarrow{(H^+ + e^-)} *HCOH</math></p>           | 1.78            |
| 56    |  <p>The reaction shows a COH species (red, grey, and cyan spheres) adsorbed on a gold surface. It reacts with a proton and an electron (<math>H^+ + e^-</math>) to form an HCOH species (red, grey, and cyan spheres) adsorbed on the surface.</p> <p style="text-align: center;"><math>*COH \xrightarrow{(H^+ + e^-)} *HCOH</math></p>           | 0.30            |

*Continued on next page*



Table S1 – *Continued from previous page*

| Index | Reaction step                                                                                                                                                                     | $\Delta E$ (eV) |
|-------|-----------------------------------------------------------------------------------------------------------------------------------------------------------------------------------|-----------------|
| 57    |  <p>Reaction of <math>*CH_2O</math> to <math>*CH_2OH</math> via <math>(H^+ + e^-)</math></p>    | -0.60           |
| 58    |  <p>Reaction of <math>*CH_2O</math> to <math>*CH_3O</math> via <math>(H^+ + e^-)</math></p>    | -0.17           |
| 59    |  <p>Reaction of <math>*HCOH</math> to <math>*CH_2OH</math> via <math>(H^+ + e^-)</math></p>   | -1.57           |
| 60    |  <p>Reaction of <math>*CH_2OH</math> to <math>*CH_3OH</math> via <math>(H^+ + e^-)</math></p> | -0.43           |

*Continued on next page*

Table S1 – *Continued from previous page*

| Index | Reaction step                                                                                                                                                              | $\Delta E$ (eV) |
|-------|----------------------------------------------------------------------------------------------------------------------------------------------------------------------------|-----------------|
| 61    | 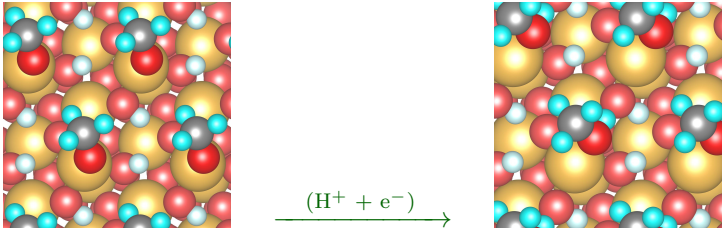<br>$\text{*CH}_3\text{O} \xrightarrow{(\text{H}^+ + \text{e}^-)} \text{*CH}_3\text{OH}$ | -0.87           |
| 62    | <br>$\text{*O} \xrightarrow{(\text{H}^+ + \text{e}^-)} \text{*OH}$                       | -0.54           |
| 63    | <br>$\text{*OH} \xrightarrow{(\text{H}^+ + \text{e}^-)} \text{*H}_2\text{O}$           | -0.91           |

Table S2: All the possible reaction paths for the formation of CH<sub>2</sub>O through electrocatalytic reduction of CO<sub>2</sub> on hematite surface and minimum potential ( $U_{min}$ ) required to make all the reaction steps downhill process. The potential determining step is given bold font.

| Index | Reaction path                                                                                                                                                                           | Path name            | $U_{min}$ (V) |
|-------|-----------------------------------------------------------------------------------------------------------------------------------------------------------------------------------------|----------------------|---------------|
| 1     | $*CO_2 \xrightarrow{+(H^+ + e^-)} *COOH \xrightarrow{+(H^+ + e^-)} *HCOOH \xrightarrow{+(H^+ + e^-)} *OCH_2OH$<br>$\xrightarrow{+(H^+ + e^-)} *HOCH_2OH \xrightarrow[-*H_2O]{} *CH_2O$  | $O_1C_2O_1A^1$       | -0.95         |
| 2     | $*CO_2 \xrightarrow{+(H^+ + e^-)} *COOH \xrightarrow{+(H^+ + e^-)} *HCOOH \xrightarrow{+(H^+ + e^-)} *OCH_2OH$<br>$\xrightarrow[+ (H^+ + e^-)]{-*H_2O} *CH_2O$                          | $O_1C_2O_1A^3$       | -0.95         |
| 3     | $*CO_2 \xrightarrow{+(H^+ + e^-)} *COOH \xrightarrow{+(H^+ + e^-)} *HCOOH \xrightarrow{+(H^+ + e^-)} *HCOHOH$<br>$\xrightarrow{+(H^+ + e^-)} *HOCH_2OH \xrightarrow[-*H_2O]{} *CH_2O$   | $O_1C_1O_1C_1A^1$    | -1.05         |
| 4     | $*CO_2 \xrightarrow{+(H^+ + e^-)} *COOH \xrightarrow{+(H^+ + e^-)} *HCOOH \xrightarrow{+(H^+ + e^-)} *HCOHOH$<br>$\xrightarrow[-*H_2O]{} *CHO \xrightarrow{+(H^+ + e^-)} *CH_2O$        | $O_1C_1O_1A^1_{C_1}$ | -1.05         |
| 5     | $*CO_2 \xrightarrow{+(H^+ + e^-)} *COOH \xrightarrow{+(H^+ + e^-)} *HCOOH \xrightarrow[+ (H^+ + e^-)]{-*H_2O} *CHO$<br>$\xrightarrow{+(H^+ + e^-)} *CH_2O$                              | $O_1C_1O_1A^3_{C_1}$ | -0.95         |
| 6     | $*CO_2 \xrightarrow{+(H^+ + e^-)} *COOH \xrightarrow{+(H^+ + e^-)} *COHOH \xrightarrow{+(H^+ + e^-)} *HCOHOH$<br>$\xrightarrow{+(H^+ + e^-)} *HOCH_2OH \xrightarrow[-*H_2O]{} *CH_2O$   | $O_2C_2A^1$          | -1.22         |
| 7     | $*CO_2 \xrightarrow{+(H^+ + e^-)} *COOH \xrightarrow{+(H^+ + e^-)} *COHOH \xrightarrow{+(H^+ + e^-)} *HCOHOH$<br>$\xrightarrow[-*H_2O]{} *CHO \xrightarrow{+(H^+ + e^-)} *CH_2O$        | $O_2C_1A^1_{C_1}$    | -1.22         |
| 8     | $*CO_2 \xrightarrow{+(H^+ + e^-)} *COOH \xrightarrow{+(H^+ + e^-)} *COHOH \xrightarrow[-*H_2O]{} *CO$<br>$\xrightarrow{+(H^+ + e^-)} *CHO \xrightarrow{+(H^+ + e^-)} *CH_2O$            | $O_2A^1_{C_2}$       | -1.22         |
| 9     | $*CO_2 \xrightarrow{+(H^+ + e^-)} *COOH \xrightarrow[+ (H^+ + e^-)]{-*H_2O} *CO \xrightarrow{+(H^+ + e^-)} *CHO$<br>$\xrightarrow{+(H^+ + e^-)} *CH_2O$                                 | $O_2A^3_{C_2}$       | -1.05         |
| 10    | $*CO_2 \xrightarrow{+(H^+ + e^-)} *HCOO \xrightarrow{+(H^+ + e^-)} *HCOOH \xrightarrow{+(H^+ + e^-)} *OCH_2OH$<br>$\xrightarrow{+(H^+ + e^-)} *HOCH_2OH \xrightarrow[-*H_2O]{} *CH_2O$  | $C_1O_1C_1O_1A^1$    | -0.18         |
| 11    | $*CO_2 \xrightarrow{+(H^+ + e^-)} *HCOO \xrightarrow{+(H^+ + e^-)} *HCOOH \xrightarrow{+(H^+ + e^-)} *OCH_2OH$<br>$\xrightarrow[+ (H^+ + e^-)]{-*H_2O} *CH_2O$                          | $C_1O_1C_1O_1A^3$    | -0.18         |
| 12    | $*CO_2 \xrightarrow{+(H^+ + e^-)} *HCOO \xrightarrow{+(H^+ + e^-)} *HCOOH \xrightarrow{+(H^+ + e^-)} *HCOHOH$<br>$\xrightarrow{+(H^+ + e^-)} *HOCH_2OH \xrightarrow[-*H_2O]{} *CH_2O$   | $C_1O_2C_1A^1$       | -1.05         |
| 13    | $*CO_2 \xrightarrow{+(H^+ + e^-)} *HCOO \xrightarrow{+(H^+ + e^-)} *HCOOH \xrightarrow{+(H^+ + e^-)} *HCOHOH$<br>$\xrightarrow[-*H_2O]{} *CHO \xrightarrow{+(H^+ + e^-)} *CH_2O$        | $C_1O_2A^1_{C_1}$    | -1.05         |
| 14    | $*CO_2 \xrightarrow{+(H^+ + e^-)} *HCOO \xrightarrow{+(H^+ + e^-)} *HCOOH \xrightarrow[+ (H^+ + e^-)]{-*H_2O} *CHO$<br>$\xrightarrow{+(H^+ + e^-)} *CH_2O$                              | $C_1O_2A^3_{C_1}$    | -0.81         |
| 15    | $*CO_2 \xrightarrow{+(H^+ + e^-)} *HCOO \xrightarrow{+(H^+ + e^-)} *OCH_2O \xrightarrow{+(H^+ + e^-)} *OCH_2OH$<br>$\xrightarrow{+(H^+ + e^-)} *HOCH_2OH \xrightarrow[-*H_2O]{} *CH_2O$ | $C_2O_2A^1$          | -1.01         |

Continued on next page

Table S2 – Continued from previous page

| Index | Reaction path                                                                                                                                                        | Path name         | $U_{min}$ (V) |
|-------|----------------------------------------------------------------------------------------------------------------------------------------------------------------------|-------------------|---------------|
| 16    | $*CO_2 \xrightarrow{+(H^+ + e^-)} *HCOO \xrightarrow{+(H^+ + e^-)} *OCH_2CO \xrightarrow{+(H^+ + e^-)} *OCH_2OH$<br>$\xrightarrow{+(H^+ + e^-)} *CH_2O$<br>$- *H_2O$ | $C_2O_2A^3$       | -1.01         |
| 17    | $*CO_2 \xrightarrow{+(H^+ + e^-)} *COOH \xrightarrow{+(H^+ + e^-)} *HCOOH \xrightarrow{+(H^+ + e^-)} *OCH_2OH$<br>$\xrightarrow{+ *OH} *CH_2O$<br>$- *OH$            | $O_1C_2B^1$       | -0.95         |
| 18    | $*CO_2 \xrightarrow{+(H^+ + e^-)} *COOH \xrightarrow{+(H^+ + e^-)} *HCOOH \xrightarrow{+(H^+ + e^-)} *CH_2O$<br>$- *OH$                                              | $O_1C_2B^3$       | -0.95         |
| 19    | $*CO_2 \xrightarrow{+(H^+ + e^-)} *COOH \xrightarrow{+(H^+ + e^-)} *HCOOH \xrightarrow{- *OH} *CHO$<br>$\xrightarrow{+(H^+ + e^-)} *CH_2O$                           | $O_1C_1B_{C_1}^1$ | -0.95         |
| 20    | $*CO_2 \xrightarrow{+(H^+ + e^-)} *COOH \xrightarrow{+(H^+ + e^-)} *CHO \xrightarrow{+(H^+ + e^-)} *CH_2O$<br>$- *OH$                                                | $O_1C_1B_{C_1}^3$ | -0.81         |
| 21    | $*CO_2 \xrightarrow{+(H^+ + e^-)} *COOH \xrightarrow{- *OH} *CO \xrightarrow{+(H^+ + e^-)} *CHO$<br>$\xrightarrow{+(H^+ + e^-)} *CH_2O$                              | $O_1B_{C_2}^1$    | -1.96         |
| 22    | $*CO_2 \xrightarrow{+(H^+ + e^-)} *HCOO \xrightarrow{+(H^+ + e^-)} *HCOOH \xrightarrow{+(H^+ + e^-)} *OCH_2OH$<br>$\xrightarrow{- *OH} *CH_2O$                       | $C_1O_1C_1B^1$    | -0.18         |
| 23    | $*CO_2 \xrightarrow{+(H^+ + e^-)} *HCOO \xrightarrow{+(H^+ + e^-)} *HCOOH \xrightarrow{+(H^+ + e^-)} *CH_2O$<br>$- *OH$                                              | $C_1O_1C_1B^3$    | -0.18         |
| 24    | $*CO_2 \xrightarrow{+(H^+ + e^-)} *HCOO \xrightarrow{+(H^+ + e^-)} *HCOOH \xrightarrow{- *OH} *CHO$<br>$\xrightarrow{+(H^+ + e^-)} *CH_2O$                           | $C_1O_1B_{C_1}^1$ | -0.81         |
| 25    | $*CO_2 \xrightarrow{+(H^+ + e^-)} *HCOO \xrightarrow{+(H^+ + e^-)} *OCH_2O \xrightarrow{+(H^+ + e^-)} *OCH_2OH$<br>$\xrightarrow{- *OH} *CH_2O$                      | $C_2O_1B^1$       | -1.01         |
| 26    | $*CO_2 \xrightarrow{+(H^+ + e^-)} *HCOO \xrightarrow{+(H^+ + e^-)} *OCH_2O \xrightarrow{+(H^+ + e^-)} *CH_2O$<br>$- *OH$                                             | $C_2O_1B^3$       | -1.01         |
| 27    | $*CO_2 \xrightarrow{+(H^+ + e^-)} *HCOO \xrightarrow{+(H^+ + e^-)} *CHO \xrightarrow{+(H^+ + e^-)} *CH_2O$<br>$- *OH$                                                | $C_1O_1B_{C_1}^3$ | -0.81         |
| 28    | $*CO_2 \xrightarrow{+(H^+ + e^-)} *CO \xrightarrow{+(H^+ + e^-)} *CHO \xrightarrow{+(H^+ + e^-)} *CH_2O$<br>$- *OH$                                                  | $O_1B_{C_2}^3$    | -1.20         |
| 29    | $*CO_2 \xrightarrow{+(H^+ + e^-)} *HCOO \xrightarrow{+(H^+ + e^-)} *OCH_2O \xrightarrow{- *O} *CH_2O$                                                                | $C_2C^1$          | -1.01         |
| 30    | $*CO_2 \xrightarrow{+(H^+ + e^-)} *HCOO \xrightarrow{+(H^+ + e^-)} *CH_2O$<br>$- *O$                                                                                 | $C_2C^3$          | -0.45         |
| 31    | $*CO_2 \xrightarrow{+(H^+ + e^-)} *HCOO \xrightarrow{- *O} *CHO \xrightarrow{+(H^+ + e^-)} *CH_2O$                                                                   | $C_1C_{C_1}^1$    | -0.81         |
| 32    | $*CO_2 \xrightarrow{+(H^+ + e^-)} *CHO \xrightarrow{+(H^+ + e^-)} *CH_2O$<br>$- *O$                                                                                  | $C_1C_{C_1}^3$    | -0.81         |
| 33    | $*CO_2 \xrightarrow{- *O} *CO \xrightarrow{+(H^+ + e^-)} *CHO \xrightarrow{+(H^+ + e^-)} *CH_2O$                                                                     | $C_{C_2}^1$       | -1.73         |



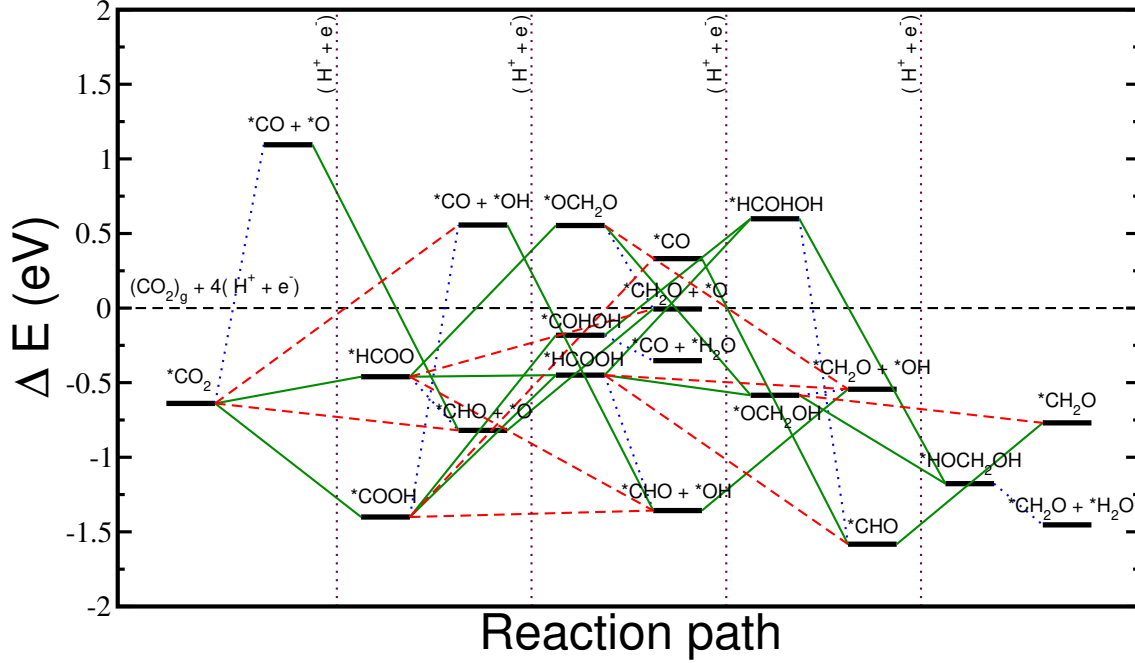

Figure S2: The free energy diagram of electrocatalytic reduction of  $\text{CO}_2$  to  $\text{CH}_2\text{O}$  on hematite surface at 0 V (RHE). The reaction step types (1), (2) and (3) presented in Section-2 of main article are respectively represented by blue dotted lines, green solid lines and red dashed lines. The vertical lines represents the proton-electron transfer step.

Table S3: All the possible reaction paths for the formation of  $\text{CH}_3\text{OH}$  through electrocatalytic reduction of  $\text{CO}_2$  on hematite surface and minimum potential ( $U_{\min}$ ) required to make all the reaction steps downhill process. The potential determining step is given bold font.

| Index | Reaction path                                                                                                                                                                                                                                                                                                                                                                                                                                                                                   | Path name                                                         | $U_{\min}$ (V) |
|-------|-------------------------------------------------------------------------------------------------------------------------------------------------------------------------------------------------------------------------------------------------------------------------------------------------------------------------------------------------------------------------------------------------------------------------------------------------------------------------------------------------|-------------------------------------------------------------------|----------------|
| 1     | $\text{*CO}_2 \xrightarrow{+ (\text{H}^+ + \text{e}^-)} \text{*COOH} \xrightarrow{+ (\text{H}^+ + \text{e}^-)} \text{*HCOOH} \xrightarrow{+ (\text{H}^+ + \text{e}^-)} \text{*OCH}_2\text{OH}$<br>$\xrightarrow{+ (\text{H}^+ + \text{e}^-)} \text{*HOCH}_2\text{OH} \xrightarrow[-\text{*H}_2\text{O}]{+ (\text{H}^+ + \text{e}^-)} \text{*CH}_2\text{OH} \xrightarrow{+ (\text{H}^+ + \text{e}^-)} \text{*CH}_3\text{OH}$                                                                     | $\text{O}_1\text{C}_2\text{O}_2\text{A}_{\text{C}_1}^3$           | -0.95          |
| 2     | $\text{*CO}_2 \xrightarrow{+ (\text{H}^+ + \text{e}^-)} \text{*COOH} \xrightarrow{+ (\text{H}^+ + \text{e}^-)} \text{*HCOOH} \xrightarrow{+ (\text{H}^+ + \text{e}^-)} \text{*OCH}_2\text{OH}$<br>$\xrightarrow{+ (\text{H}^+ + \text{e}^-)} \text{*HOCH}_2\text{OH} \xrightarrow[-\text{*H}_2\text{O}]{+ (\text{H}^+ + \text{e}^-)} \text{*CH}_2\text{O} \xrightarrow{+ (\text{H}^+ + \text{e}^-)} \text{*CH}_2\text{OH}$<br>$\xrightarrow{+ (\text{H}^+ + \text{e}^-)} \text{*CH}_3\text{OH}$ | $\text{O}_1\text{C}_2\text{O}_1\text{A}_{\text{O}_1\text{C}_1}^1$ | -0.95          |
| 3     | $\text{*CO}_2 \xrightarrow{+ (\text{H}^+ + \text{e}^-)} \text{*COOH} \xrightarrow{+ (\text{H}^+ + \text{e}^-)} \text{*HCOOH} \xrightarrow{+ (\text{H}^+ + \text{e}^-)} \text{*OCH}_2\text{OH}$<br>$\xrightarrow{+ (\text{H}^+ + \text{e}^-)} \text{*HOCH}_2\text{OH} \xrightarrow[-\text{*H}_2\text{O}]{+ (\text{H}^+ + \text{e}^-)} \text{*CH}_2\text{O} \xrightarrow{+ (\text{H}^+ + \text{e}^-)} \text{*CH}_3\text{O}$<br>$\xrightarrow{+ (\text{H}^+ + \text{e}^-)} \text{*CH}_3\text{OH}$  | $\text{O}_1\text{C}_2\text{O}_1\text{A}_{\text{C}_1\text{O}_1}^1$ | -0.95          |
| 4     | $\text{*CO}_2 \xrightarrow{+ (\text{H}^+ + \text{e}^-)} \text{*COOH} \xrightarrow{+ (\text{H}^+ + \text{e}^-)} \text{*HCOOH} \xrightarrow{+ (\text{H}^+ + \text{e}^-)} \text{*OCH}_2\text{OH}$<br>$\xrightarrow[-\text{*H}_2\text{O}]{+ (\text{H}^+ + \text{e}^-)} \text{*CH}_2\text{O} \xrightarrow{+ (\text{H}^+ + \text{e}^-)} \text{*CH}_2\text{OH} \xrightarrow{+ (\text{H}^+ + \text{e}^-)} \text{*CH}_3\text{OH}$                                                                        | $\text{O}_1\text{C}_2\text{O}_1\text{A}_{\text{O}_1\text{C}_1}^3$ | -0.95          |
| 5     | $\text{*CO}_2 \xrightarrow{+ (\text{H}^+ + \text{e}^-)} \text{*COOH} \xrightarrow{+ (\text{H}^+ + \text{e}^-)} \text{*HCOOH} \xrightarrow{+ (\text{H}^+ + \text{e}^-)} \text{*OCH}_2\text{OH}$<br>$\xrightarrow[-\text{*H}_2\text{O}]{+ (\text{H}^+ + \text{e}^-)} \text{*CH}_2\text{O} \xrightarrow{+ (\text{H}^+ + \text{e}^-)} \text{*CH}_3\text{O} \xrightarrow{+ (\text{H}^+ + \text{e}^-)} \text{*CH}_3\text{OH}$                                                                         | $\text{O}_1\text{C}_2\text{O}_1\text{A}_{\text{C}_1\text{O}_1}^3$ | -0.95          |

Continued on next page

Table S3 – Continued from previous page

| Index | Reaction path                                                                                                                                                                                                                                                    | Path name                  | $U_{min}$ (V) |
|-------|------------------------------------------------------------------------------------------------------------------------------------------------------------------------------------------------------------------------------------------------------------------|----------------------------|---------------|
| 6     | $*CO_2 \xrightarrow{+(H^+ + e^-)} *COOH \xrightarrow{+(H^+ + e^-)} *HCOOH \xrightarrow{+(H^+ + e^-)} *HCOHOH$<br>$\xrightarrow{+(H^+ + e^-)} *HOCH_2OH \xrightarrow[-*H_2O]{+(H^+ + e^-)} *CH_2OH \xrightarrow{+(H^+ + e^-)} *CH_3OH$                            | $O_1C_1O_1C_1O_1A_{C_1}^3$ | -1.05         |
| 7     | $*CO_2 \xrightarrow{+(H^+ + e^-)} *COOH \xrightarrow{+(H^+ + e^-)} *HCOOH \xrightarrow{+(H^+ + e^-)} *HCOHOH$<br>$\xrightarrow{+(H^+ + e^-)} *HOCH_2OH \xrightarrow[-*H_2O]{} *CH_2O \xrightarrow{+(H^+ + e^-)} *CH_2OH$<br>$\xrightarrow{+(H^+ + e^-)} *CH_3OH$ | $O_1C_1O_1C_1A_{O_1C_1}^1$ | -1.05         |
| 8     | $*CO_2 \xrightarrow{+(H^+ + e^-)} *COOH \xrightarrow{+(H^+ + e^-)} *HCOOH \xrightarrow{+(H^+ + e^-)} *HCOHOH$<br>$\xrightarrow{+(H^+ + e^-)} *HOCH_2OH \xrightarrow[-*H_2O]{} *CH_2O \xrightarrow{+(H^+ + e^-)} *CH_3O$<br>$\xrightarrow{+(H^+ + e^-)} *CH_3OH$  | $O_1C_1O_1C_1A_{C_1O_1}^1$ | -1.05         |
| 9     | $*CO_2 \xrightarrow{+(H^+ + e^-)} *COOH \xrightarrow{+(H^+ + e^-)} *HCOOH \xrightarrow{+(H^+ + e^-)} *HCOHOH$<br>$\xrightarrow[-*H_2O]{+(H^+ + e^-)} *HCOH \xrightarrow{+(H^+ + e^-)} *CH_2OH \xrightarrow{+(H^+ + e^-)} *CH_3OH$                                | $O_1C_1O_2A_{C_2}^3$       | -1.05         |
| 10    | $*CO_2 \xrightarrow{+(H^+ + e^-)} *COOH \xrightarrow{+(H^+ + e^-)} *HCOOH \xrightarrow{+(H^+ + e^-)} *HCOHOH$<br>$\xrightarrow[-*H_2O]{} *CHO \xrightarrow{+(H^+ + e^-)} *CH_2O \xrightarrow{+(H^+ + e^-)} *CH_2OH$<br>$\xrightarrow{+(H^+ + e^-)} *CH_3OH$      | $O_1C_1O_1A_{C_1O_1C_1}^1$ | -1.05         |
| 11    | $*CO_2 \xrightarrow{+(H^+ + e^-)} *COOH \xrightarrow{+(H^+ + e^-)} *HCOOH \xrightarrow{+(H^+ + e^-)} *HCOHOH$<br>$\xrightarrow[-*H_2O]{} *CHO \xrightarrow{+(H^+ + e^-)} *CH_2O \xrightarrow{+(H^+ + e^-)} *CH_3O$<br>$\xrightarrow{+(H^+ + e^-)} *CH_3OH$       | $O_1C_1O_1A_{C_2O_1}^1$    | -1.05         |
| 12    | $*CO_2 \xrightarrow{+(H^+ + e^-)} *COOH \xrightarrow{+(H^+ + e^-)} *HCOOH \xrightarrow{+(H^+ + e^-)} *HCOHOH$<br>$\xrightarrow[-*H_2O]{} * \xrightarrow{+(H^+ + e^-)} *HCOH \xrightarrow{+(H^+ + e^-)} *CH_2OH$<br>$\xrightarrow{+(H^+ + e^-)} *CH_3OH$          | $O_1C_1O_1A_{O_1C_2}^1$    | -1.78         |
| 13    | $*CO_2 \xrightarrow{+(H^+ + e^-)} *COOH \xrightarrow{+(H^+ + e^-)} *HCOOH \xrightarrow[-*H_2O]{+(H^+ + e^-)} *CHO$<br>$\xrightarrow{+(H^+ + e^-)} *CH_2O \xrightarrow{+(H^+ + e^-)} *CH_2OH \xrightarrow{+(H^+ + e^-)} *CH_3OH$                                  | $O_1C_1O_1A_{C_1O_1C_1}^3$ | -0.95         |
| 14    | $*CO_2 \xrightarrow{+(H^+ + e^-)} *COOH \xrightarrow{+(H^+ + e^-)} *HCOOH \xrightarrow[-*H_2O]{+(H^+ + e^-)} *CHO$<br>$\xrightarrow{+(H^+ + e^-)} *CH_2O \xrightarrow{+(H^+ + e^-)} *CH_3O \xrightarrow{+(H^+ + e^-)} *CH_3OH$                                   | $O_1C_1O_1A_{C_2O_1}^3$    | -0.95         |
| 15    | $*CO_2 \xrightarrow{+(H^+ + e^-)} *COOH \xrightarrow{+(H^+ + e^-)} *HCOOH \xrightarrow[-*H_2O]{+(H^+ + e^-)} *CHO$<br>$\xrightarrow{+(H^+ + e^-)} *HCOH \xrightarrow{+(H^+ + e^-)} *CH_2OH \xrightarrow{+(H^+ + e^-)} *CH_3OH$                                   | $O_1C_1O_1A_{O_1C_2}^3$    | -1.78         |
| 16    | $*CO_2 \xrightarrow{+(H^+ + e^-)} *COOH \xrightarrow{+(H^+ + e^-)} *COHOH \xrightarrow{+(H^+ + e^-)} *HCOHOH$<br>$\xrightarrow{+(H^+ + e^-)} *HOCH_2OH \xrightarrow[-*H_2O]{+(H^+ + e^-)} *CH_2OH \xrightarrow{+(H^+ + e^-)} *CH_3OH$                            | $O_2C_2A_{O_1C_1}^3$       | -1.22         |
| 17    | $*CO_2 \xrightarrow{+(H^+ + e^-)} *COOH \xrightarrow{+(H^+ + e^-)} *COHOH \xrightarrow{+(H^+ + e^-)} *HCOHOH$<br>$\xrightarrow{+(H^+ + e^-)} *HOCH_2OH \xrightarrow[-*H_2O]{} *CH_2O \xrightarrow{+(H^+ + e^-)} *CH_2OH$<br>$\xrightarrow{+(H^+ + e^-)} *CH_3OH$ | $O_2C_2A_{O_1C_1}^1$       | -1.22         |
| 18    | $*CO_2 \xrightarrow{+(H^+ + e^-)} *COOH \xrightarrow{+(H^+ + e^-)} *COHOH \xrightarrow{+(H^+ + e^-)} *HCOHOH$<br>$\xrightarrow{+(H^+ + e^-)} *HOCH_2OH \xrightarrow[-*H_2O]{} *CH_2O \xrightarrow{+(H^+ + e^-)} *CH_3O$<br>$\xrightarrow{+(H^+ + e^-)} *CH_3OH$  | $O_2C_2A_{C_1O_1}^1$       | -1.22         |

Continued on next page

Table S3 – Continued from previous page

| Index | Reaction path                                                                                                                                                                                                                                             | Path name               | $U_{min}$ (V) |
|-------|-----------------------------------------------------------------------------------------------------------------------------------------------------------------------------------------------------------------------------------------------------------|-------------------------|---------------|
| 19    | $*CO_2 \xrightarrow{+(H^+ + e^-)} *COOH \xrightarrow{+(H^+ + e^-)} *COHOH \xrightarrow{+(H^+ + e^-)} *HCOHOH$<br>$\xrightarrow{+(H^+ + e^-)} *HCOH \xrightarrow{+(H^+ + e^-)} *CH_2OH \xrightarrow{+(H^+ + e^-)} *CH_3OH$<br>$\xrightarrow{-*H_2O}$       | $O_2C_1O_1A_{C_2}^3$    | -1.22         |
| 20    | $*CO_2 \xrightarrow{+(H^+ + e^-)} *COOH \xrightarrow{+(H^+ + e^-)} *COHOH \xrightarrow{+(H^+ + e^-)} *HCOHOH$<br>$\xrightarrow{-*H_2O} *CHO \xrightarrow{+(H^+ + e^-)} *CH_2O \xrightarrow{+(H^+ + e^-)} *CH_2OH$<br>$\xrightarrow{+(H^+ + e^-)} *CH_3OH$ | $O_2C_1A_{C_1O_1C_1}^1$ | -1.22         |
| 21    | $*CO_2 \xrightarrow{+(H^+ + e^-)} *COOH \xrightarrow{+(H^+ + e^-)} *COHOH \xrightarrow{+(H^+ + e^-)} *HCOHOH$<br>$\xrightarrow{-*H_2O} *CHO \xrightarrow{+(H^+ + e^-)} *CH_2O \xrightarrow{+(H^+ + e^-)} *CH_3O$<br>$\xrightarrow{+(H^+ + e^-)} *CH_3OH$  | $O_2C_1A_{C_2O_1}^1$    | -1.22         |
| 22    | $*CO_2 \xrightarrow{+(H^+ + e^-)} *COOH \xrightarrow{+(H^+ + e^-)} *COHOH \xrightarrow{+(H^+ + e^-)} *HCOHOH$<br>$\xrightarrow{-*H_2O} *CHO \xrightarrow{+(H^+ + e^-)} *HCOH \xrightarrow{+(H^+ + e^-)} *CH_2OH$<br>$\xrightarrow{+(H^+ + e^-)} *CH_3OH$  | $O_2C_1A_{O_1C_2}^1$    | -1.78         |
| 23    | $*CO_2 \xrightarrow{+(H^+ + e^-)} *COOH \xrightarrow{+(H^+ + e^-)} *COHOH \xrightarrow{+(H^+ + e^-)} *COH$<br>$\xrightarrow{+(H^+ + e^-)} *HCOH \xrightarrow{+(H^+ + e^-)} *CH_2OH \xrightarrow{+(H^+ + e^-)} *CH_3OH$<br>$\xrightarrow{-*H_2O}$          | $O_3A_{C_3}^3$          | -1.22         |
| 24    | $*CO_2 \xrightarrow{+(H^+ + e^-)} *COOH \xrightarrow{+(H^+ + e^-)} *COHOH \xrightarrow{-*H_2O} *CO$<br>$\xrightarrow{+(H^+ + e^-)} *CHO \xrightarrow{+(H^+ + e^-)} *CH_2O \xrightarrow{+(H^+ + e^-)} *CH_2OH$<br>$\xrightarrow{+(H^+ + e^-)} *CH_3OH$     | $O_2A_{C_2O_1C_1}^1$    | -1.22         |
| 25    | $*CO_2 \xrightarrow{+(H^+ + e^-)} *COOH \xrightarrow{+(H^+ + e^-)} *COHOH \xrightarrow{-*H_2O} *CO$<br>$\xrightarrow{+(H^+ + e^-)} *CHO \xrightarrow{+(H^+ + e^-)} *CH_2O \xrightarrow{+(H^+ + e^-)} *CH_3O$<br>$\xrightarrow{+(H^+ + e^-)} *CH_3OH$      | $O_2A_{C_3O_1}^1$       | -1.22         |
| 26    | $*CO_2 \xrightarrow{+(H^+ + e^-)} *COOH \xrightarrow{+(H^+ + e^-)} *COHOH \xrightarrow{-*H_2O} *CO$<br>$\xrightarrow{+(H^+ + e^-)} *CHO \xrightarrow{+(H^+ + e^-)} *HCOH \xrightarrow{+(H^+ + e^-)} *CH_2OH$<br>$\xrightarrow{+(H^+ + e^-)} *CH_3OH$      | $O_2A_{C_1O_1C_2}^1$    | -1.78         |
| 27    | $*CO_2 \xrightarrow{+(H^+ + e^-)} *COOH \xrightarrow{+(H^+ + e^-)} *COHOH \xrightarrow{-*H_2O} *CO$<br>$\xrightarrow{+(H^+ + e^-)} *COH \xrightarrow{+(H^+ + e^-)} *HCOH \xrightarrow{+(H^+ + e^-)} *CH_2OH$<br>$\xrightarrow{+(H^+ + e^-)} *CH_3OH$      | $O_2A_{O_1C_3}^1$       | -1.22         |
| 28    | $*CO_2 \xrightarrow{+(H^+ + e^-)} *COOH \xrightarrow{+(H^+ + e^-)} *CO \xrightarrow{+(H^+ + e^-)} *CHO$<br>$\xrightarrow{+(H^+ + e^-)} *CH_2O \xrightarrow{+(H^+ + e^-)} *CH_2OH \xrightarrow{+(H^+ + e^-)} *CH_3OH$<br>$\xrightarrow{-*H_2O}$            | $O_2A_{C_2O_1C_1}^3$    | -1.05         |
| 29    | $*CO_2 \xrightarrow{+(H^+ + e^-)} *COOH \xrightarrow{+(H^+ + e^-)} *CO \xrightarrow{+(H^+ + e^-)} *CHO$<br>$\xrightarrow{+(H^+ + e^-)} *CH_2O \xrightarrow{+(H^+ + e^-)} *CH_3O \xrightarrow{+(H^+ + e^-)} *CH_3OH$<br>$\xrightarrow{-*H_2O}$             | $O_2A_{C_3O_1}^3$       | -1.05         |
| 30    | $*CO_2 \xrightarrow{+(H^+ + e^-)} *COOH \xrightarrow{+(H^+ + e^-)} *CO \xrightarrow{+(H^+ + e^-)} *CHO$<br>$\xrightarrow{+(H^+ + e^-)} *HCOH \xrightarrow{+(H^+ + e^-)} *CH_2OH \xrightarrow{+(H^+ + e^-)} *CH_3OH$<br>$\xrightarrow{-*H_2O}$             | $O_2A_{C_1O_1C_2}^3$    | -1.78         |
| 31    | $*CO_2 \xrightarrow{+(H^+ + e^-)} *COOH \xrightarrow{+(H^+ + e^-)} *CO \xrightarrow{+(H^+ + e^-)} *COH$<br>$\xrightarrow{+(H^+ + e^-)} *HCOH \xrightarrow{+(H^+ + e^-)} *CH_2OH \xrightarrow{+(H^+ + e^-)} *CH_3OH$<br>$\xrightarrow{-*H_2O}$             | $O_2A_{O_1C_3}^3$       | -1.05         |

Continued on next page

Table S3 – Continued from previous page

| Index | Reaction path                                                                                                                                                                                                                                                                  | Path name                  | $U_{min}$ (V) |
|-------|--------------------------------------------------------------------------------------------------------------------------------------------------------------------------------------------------------------------------------------------------------------------------------|----------------------------|---------------|
| 32    | $*CO_2 \xrightarrow{+(H^+ + e^-)} *HCOO \xrightarrow{+(H^+ + e^-)} *HCOOH \xrightarrow{+(H^+ + e^-)} *OCH_2OH$<br>$\xrightarrow{+(H^+ + e^-)} *HOCH_2OH \xrightarrow[+ (H^+ + e^-)]{- *H_2O} *CH_2OH \xrightarrow{+(H^+ + e^-)} *CH_3OH$                                       | $C_1O_1C_1O_2A_{C_1}^3$    | -0.18         |
| 33    | $*CO_2 \xrightarrow{+(H^+ + e^-)} *HCOO \xrightarrow{+(H^+ + e^-)} *HCOOH \xrightarrow{+(H^+ + e^-)} *OCH_2OH$<br>$\xrightarrow{+(H^+ + e^-)} *HOCH_2OH \xrightarrow[-*H_2O]{+ (H^+ + e^-)} *CH_2O \xrightarrow{+(H^+ + e^-)} *CH_2OH$<br>$\xrightarrow{+(H^+ + e^-)} *CH_3OH$ | $C_1O_1C_1O_1A_{O_1C_1}^1$ | -0.18         |
| 34    | $*CO_2 \xrightarrow{+(H^+ + e^-)} *HCOO \xrightarrow{+(H^+ + e^-)} *HCOOH \xrightarrow{+(H^+ + e^-)} *OCH_2OH$<br>$\xrightarrow{+(H^+ + e^-)} *HOCH_2OH \xrightarrow[-*H_2O]{+ (H^+ + e^-)} *CH_2O \xrightarrow{+(H^+ + e^-)} *CH_3O$<br>$\xrightarrow{+(H^+ + e^-)} *CH_3OH$  | $C_1O_1C_1O_1A_{C_1O_1}^1$ | -0.18         |
| 35    | $*CO_2 \xrightarrow{+(H^+ + e^-)} *HCOO \xrightarrow{+(H^+ + e^-)} *HCOOH \xrightarrow{+(H^+ + e^-)} *OCH_2OH$<br>$\xrightarrow[+ (H^+ + e^-)]{- *H_2O} *CH_2O \xrightarrow{+(H^+ + e^-)} *CH_2OH \xrightarrow{+(H^+ + e^-)} *CH_3OH$                                          | $C_1O_1C_1O_1A_{O_1C_1}^3$ | -0.18         |
| 36    | $*CO_2 \xrightarrow{+(H^+ + e^-)} *HCOO \xrightarrow{+(H^+ + e^-)} *HCOOH \xrightarrow{+(H^+ + e^-)} *OCH_2OH$<br>$\xrightarrow[+ (H^+ + e^-)]{- *H_2O} *CH_2O \xrightarrow{+(H^+ + e^-)} *CH_3O \xrightarrow{+(H^+ + e^-)} *CH_3OH$                                           | $C_1O_1C_1O_1A_{C_1O_1}^3$ | -0.18         |
| 37    | $*CO_2 \xrightarrow{+(H^+ + e^-)} *HCOO \xrightarrow{+(H^+ + e^-)} *HCOOH \xrightarrow{+(H^+ + e^-)} *HCOHOH$<br>$\xrightarrow{+(H^+ + e^-)} *HOCH_2OH \xrightarrow[+ (H^+ + e^-)]{- *H_2O} *CH_2OH \xrightarrow{+(H^+ + e^-)} *CH_3OH$                                        | $C_1O_2C_1O_1A_{C_1}^3$    | -1.05         |
| 38    | $*CO_2 \xrightarrow{+(H^+ + e^-)} *HCOO \xrightarrow{+(H^+ + e^-)} *HCOOH \xrightarrow{+(H^+ + e^-)} *HCOHOH$<br>$\xrightarrow{+(H^+ + e^-)} *HOCH_2OH \xrightarrow[-*H_2O]{+ (H^+ + e^-)} *CH_2O \xrightarrow{+(H^+ + e^-)} *CH_2OH$<br>$\xrightarrow{+(H^+ + e^-)} *CH_3OH$  | $C_1O_2C_1A_{O_1C_1}^1$    | -1.05         |
| 39    | $*CO_2 \xrightarrow{+(H^+ + e^-)} *HCOO \xrightarrow{+(H^+ + e^-)} *HCOOH \xrightarrow{+(H^+ + e^-)} *HCOHOH$<br>$\xrightarrow{+(H^+ + e^-)} *HOCH_2OH \xrightarrow[-*H_2O]{+ (H^+ + e^-)} *CH_2O \xrightarrow{+(H^+ + e^-)} *CH_3O$<br>$\xrightarrow{+(H^+ + e^-)} *CH_3OH$   | $C_1O_2C_1A_{C_1O_1}^1$    | -1.05         |
| 40    | $*CO_2 \xrightarrow{+(H^+ + e^-)} *HCOO \xrightarrow{+(H^+ + e^-)} *HCOOH \xrightarrow{+(H^+ + e^-)} *HCOHOH$<br>$\xrightarrow[+ (H^+ + e^-)]{- *H_2O} *HCOH \xrightarrow{+(H^+ + e^-)} *CH_2OH \xrightarrow{+(H^+ + e^-)} *CH_3OH$                                            | $C_1O_3A_{C_2}^3$          | -1.05         |
| 41    | $*CO_2 \xrightarrow{+(H^+ + e^-)} *HCOO \xrightarrow{+(H^+ + e^-)} *HCOOH \xrightarrow{+(H^+ + e^-)} *HCOHOH$<br>$\xrightarrow[-*H_2O]{+ (H^+ + e^-)} *CHO \xrightarrow{+(H^+ + e^-)} *CH_2O \xrightarrow{+(H^+ + e^-)} *CH_2OH$<br>$\xrightarrow{+(H^+ + e^-)} *CH_3OH$       | $C_1O_2A_{C_1O_1C_1}^1$    | -1.05         |
| 42    | $*CO_2 \xrightarrow{+(H^+ + e^-)} *HCOO \xrightarrow{+(H^+ + e^-)} *HCOOH \xrightarrow{+(H^+ + e^-)} *HCOHOH$<br>$\xrightarrow[-*H_2O]{+ (H^+ + e^-)} *CHO \xrightarrow{+(H^+ + e^-)} *CH_2O \xrightarrow{+(H^+ + e^-)} *CH_3O$<br>$\xrightarrow{+(H^+ + e^-)} *CH_3OH$        | $C_1O_2A_{C_2O_1}^1$       | -1.05         |
| 43    | $*CO_2 \xrightarrow{+(H^+ + e^-)} *HCOO \xrightarrow{+(H^+ + e^-)} *HCOOH \xrightarrow{+(H^+ + e^-)} *HCOHOH$<br>$\xrightarrow[-*H_2O]{+ (H^+ + e^-)} *CHO \xrightarrow{+(H^+ + e^-)} *HCOH \xrightarrow{+(H^+ + e^-)} *CH_2OH$<br>$\xrightarrow{+(H^+ + e^-)} *CH_3OH$        | $C_1O_2A_{O_1C_2}^1$       | -1.78         |
| 44    | $*CO_2 \xrightarrow{+(H^+ + e^-)} *HCOO \xrightarrow{+(H^+ + e^-)} *HCOOH \xrightarrow[+ (H^+ + e^-)]{- *H_2O} *CHO$<br>$\xrightarrow{+(H^+ + e^-)} *CH_2O \xrightarrow{+(H^+ + e^-)} *CH_2OH \xrightarrow{+(H^+ + e^-)} *CH_3OH$                                              | $C_1O_2A_{C_1O_1C_1}^3$    | -0.81         |

Continued on next page



Table S3 – Continued from previous page

| Index | Reaction path                                                                                                                                                                                                                                                     | Path name               | $U_{min}$ (V) |
|-------|-------------------------------------------------------------------------------------------------------------------------------------------------------------------------------------------------------------------------------------------------------------------|-------------------------|---------------|
| 45    | $*CO_2 \xrightarrow{+(H^+ + e^-)} *HCOO \xrightarrow{+(H^+ + e^-)} *HCOOH \xrightarrow{+(H^+ + e^-) - *H_2O} *CHO$<br>$\xrightarrow{+(H^+ + e^-)} *CH_2O \xrightarrow{+(H^+ + e^-)} *CH_3O \xrightarrow{+(H^+ + e^-)} *CH_3OH$                                    | $C_1O_2A_{C_2O_1}^3$    | -0.81         |
| 46    | $*CO_2 \xrightarrow{+(H^+ + e^-)} *HCOO \xrightarrow{+(H^+ + e^-)} *HCOOH \xrightarrow{+(H^+ + e^-) - *H_2O} *CHO$<br>$\xrightarrow{+(H^+ + e^-)} *HCOH \xrightarrow{+(H^+ + e^-)} *CH_2OH \xrightarrow{+(H^+ + e^-)} *CH_3OH$                                    | $C_1O_2A_{O_1C_2}^3$    | -1.78         |
| 47    | $*CO_2 \xrightarrow{+(H^+ + e^-)} *HCOO \xrightarrow{+(H^+ + e^-)} *OCH_2O \xrightarrow{+(H^+ + e^-)} *OCH_2OH$<br>$\xrightarrow{+(H^+ + e^-)} *HOCH_2OH \xrightarrow{+(H^+ + e^-) - *H_2O} *CH_2OH \xrightarrow{+(H^+ + e^-)} *CH_3OH$                           | $C_2O_3A_{C_1}^3$       | -1.01         |
| 48    | $*CO_2 \xrightarrow{+(H^+ + e^-)} *HCOO \xrightarrow{+(H^+ + e^-)} *OCH_2O \xrightarrow{+(H^+ + e^-)} *OCH_2OH$<br>$\xrightarrow{+(H^+ + e^-)} *HOCH_2OH \xrightarrow{- *H_2O} *CH_2O \xrightarrow{+(H^+ + e^-)} *CH_2OH$<br>$\xrightarrow{+(H^+ + e^-)} *CH_3OH$ | $C_2O_2A_{O_1C_1}^1$    | -1.01         |
| 49    | $*CO_2 \xrightarrow{+(H^+ + e^-)} *HCOO \xrightarrow{+(H^+ + e^-)} *OCH_2O \xrightarrow{+(H^+ + e^-)} *OCH_2OH$<br>$\xrightarrow{+(H^+ + e^-)} *HOCH_2OH \xrightarrow{- *H_2O} *CH_2O \xrightarrow{+(H^+ + e^-)} *CH_3O$<br>$\xrightarrow{+(H^+ + e^-)} *CH_3OH$  | $C_2O_2A_{C_1O_1}^1$    | -1.01         |
| 50    | $*CO_2 \xrightarrow{+(H^+ + e^-)} *HCOO \xrightarrow{+(H^+ + e^-)} *OCH_2O \xrightarrow{+(H^+ + e^-)} *OCH_2OH$<br>$\xrightarrow{+(H^+ + e^-) - *H_2O} *CH_2O \xrightarrow{+(H^+ + e^-)} *CH_2OH \xrightarrow{+(H^+ + e^-)} *CH_3OH$                              | $C_2O_2A_{O_1C_1}^3$    | -1.01         |
| 51    | $*CO_2 \xrightarrow{+(H^+ + e^-)} *HCOO \xrightarrow{+(H^+ + e^-)} *OCH_2O \xrightarrow{+(H^+ + e^-)} *OCH_2OH$<br>$\xrightarrow{+(H^+ + e^-) - *H_2O} *CH_2O \xrightarrow{+(H^+ + e^-)} *CH_3O \xrightarrow{+(H^+ + e^-)} *CH_3OH$                               | $C_2O_2A_{C_1O_1}^3$    | -1.01         |
| 52    | $*CO_2 \xrightarrow{+(H^+ + e^-)} *COOH \xrightarrow{+(H^+ + e^-)} *HCOOH \xrightarrow{+(H^+ + e^-)} *OCH_2OH$<br>$\xrightarrow{+(H^+ + e^-)} *HOCH_2OH \xrightarrow{+(H^+ + e^-) - *OH} *CH_3OH$                                                                 | $O_1C_2O_1C_1B^3$       | -0.95         |
| 53    | $*CO_2 \xrightarrow{+(H^+ + e^-)} *COOH \xrightarrow{+(H^+ + e^-)} *HCOOH \xrightarrow{+(H^+ + e^-)} *OCH_2OH$<br>$\xrightarrow{+(H^+ + e^-)} *HOCH_2OH \xrightarrow{- *OH} *CH_2OH \xrightarrow{+(H^+ + e^-)} *CH_3OH$                                           | $O_1C_2O_1B_{C_1}^1$    | -0.95         |
| 54    | $*CO_2 \xrightarrow{+(H^+ + e^-)} *COOH \xrightarrow{+(H^+ + e^-)} *HCOOH \xrightarrow{+(H^+ + e^-)} *OCH_2OH$<br>$\xrightarrow{+(H^+ + e^-) - *OH} *CH_2OH \xrightarrow{+(H^+ + e^-)} *CH_3OH$                                                                   | $O_1C_2O_1B_{C_1}^3$    | -0.95         |
| 55    | $*CO_2 \xrightarrow{+(H^+ + e^-)} *COOH \xrightarrow{+(H^+ + e^-)} *HCOOH \xrightarrow{+(H^+ + e^-)} *OCH_2OH$<br>$\xrightarrow{+(H^+ + e^-) - *OH} *CH_3O \xrightarrow{+(H^+ + e^-)} *CH_3OH$                                                                    | $O_1C_3B_{O_1}^3$       | -0.95         |
| 56    | $*CO_2 \xrightarrow{+(H^+ + e^-)} *COOH \xrightarrow{+(H^+ + e^-)} *HCOOH \xrightarrow{+(H^+ + e^-)} *OCH_2OH$<br>$\xrightarrow{- *OH} *CH_2O \xrightarrow{+(H^+ + e^-)} *CH_2OH \xrightarrow{+(H^+ + e^-)} *CH_3OH$                                              | $O_1C_2B_{O_1C_1}^1$    | -0.95         |
| 57    | $*CO_2 \xrightarrow{+(H^+ + e^-)} *COOH \xrightarrow{+(H^+ + e^-)} *HCOOH \xrightarrow{+(H^+ + e^-)} *OCH_2OH$<br>$\xrightarrow{- *OH} *CH_2O \xrightarrow{+(H^+ + e^-)} *CH_3O \xrightarrow{+(H^+ + e^-)} *CH_3OH$                                               | $O_1C_2B_{C_1O_1}^1$    | -0.95         |
| 58    | $*CO_2 \xrightarrow{+(H^+ + e^-)} *COOH \xrightarrow{+(H^+ + e^-)} *HCOOH \xrightarrow{+(H^+ + e^-)} *HCOHOH$<br>$\xrightarrow{+(H^+ + e^-)} *HOCH_2OH \xrightarrow{+(H^+ + e^-) - *OH} *CH_3OH$                                                                  | $O_1C_1O_1C_2B^3$       | -1.05         |
| 59    | $*CO_2 \xrightarrow{+(H^+ + e^-)} *COOH \xrightarrow{+(H^+ + e^-)} *HCOOH \xrightarrow{+(H^+ + e^-)} *HCOHOH$<br>$\xrightarrow{+(H^+ + e^-)} *HOCH_2OH \xrightarrow{- *OH} *CH_2OH \xrightarrow{+(H^+ + e^-)} *CH_3OH$                                            | $O_1C_1O_1C_1B_{C_1}^1$ | -1.05         |
| 60    | $*CO_2 \xrightarrow{+(H^+ + e^-)} *COOH \xrightarrow{+(H^+ + e^-)} *HCOOH \xrightarrow{+(H^+ + e^-)} *HCOHOH$                                                                                                                                                     |                         |               |

Continued on next page

Table S3 – Continued from previous page

| Index | Reaction path                                                                                                                                                                                                                                                                                                              | Path name                                           | $U_{min}$ (V)      |
|-------|----------------------------------------------------------------------------------------------------------------------------------------------------------------------------------------------------------------------------------------------------------------------------------------------------------------------------|-----------------------------------------------------|--------------------|
| 61    | $\xrightarrow[+ *OH]{+ (H^+ + e^-)} *CH_2OH \xrightarrow{+ (H^+ + e^-)} *CH_3OH$<br>$*CO_2 \xrightarrow{+ (H^+ + e^-)} *COOH \xrightarrow{+ (H^+ + e^-)} *HCOOH \xrightarrow{+ (H^+ + e^-)} *HCOHOH$<br>$\xrightarrow[+ *OH]{+ (H^+ + e^-)} *HCOH \xrightarrow{+ (H^+ + e^-)} *CH_2OH \xrightarrow{+ (H^+ + e^-)} *CH_3OH$ | $O_1C_1O_1C_1B_{C_1}^3$<br><br>$O_1C_1O_1B_{C_2}^1$ | -1.05<br><br>-1.05 |
| 62    | $*CO_2 \xrightarrow{+ (H^+ + e^-)} *COOH \xrightarrow{+ (H^+ + e^-)} *HCOOH \xrightarrow[+ *OH]{+ (H^+ + e^-)} *CH_2O$<br>$\xrightarrow{+ (H^+ + e^-)} *CH_2OH \xrightarrow{+ (H^+ + e^-)} *CH_3OH$                                                                                                                        | $O_1C_2B_{O_1C_1}^3$                                | -0.95              |
| 63    | $*CO_2 \xrightarrow{+ (H^+ + e^-)} *COOH \xrightarrow{+ (H^+ + e^-)} *HCOOH \xrightarrow[+ *OH]{+ (H^+ + e^-)} *CH_2O$<br>$\xrightarrow{+ (H^+ + e^-)} *CH_3O \xrightarrow{+ (H^+ + e^-)} *CH_3OH$                                                                                                                         | $O_1C_2B_{C_1O_1}^3$                                | -0.95              |
| 64    | $*CO_2 \xrightarrow{+ (H^+ + e^-)} *COOH \xrightarrow{+ (H^+ + e^-)} *HCOOH \xrightarrow[+ *OH]{+ (H^+ + e^-)} *HCOH$<br>$\xrightarrow{+ (H^+ + e^-)} *CH_2OH \xrightarrow{+ (H^+ + e^-)} *CH_3OH$                                                                                                                         | $O_1C_1O_1B_{C_2}^3$                                | -0.95              |
| 65    | $*CO_2 \xrightarrow{+ (H^+ + e^-)} *COOH \xrightarrow{+ (H^+ + e^-)} *HCOOH \xrightarrow[+ *OH]{+ (H^+ + e^-)} *CHO$<br>$\xrightarrow{+ (H^+ + e^-)} *CH_2O \xrightarrow{+ (H^+ + e^-)} *CH_2OH \xrightarrow{+ (H^+ + e^-)} *CH_3OH$                                                                                       | $O_1C_1B_{C_1O_1C_1}^1$                             | -0.95              |
| 66    | $*CO_2 \xrightarrow{+ (H^+ + e^-)} *COOH \xrightarrow{+ (H^+ + e^-)} *HCOOH \xrightarrow[+ *OH]{+ (H^+ + e^-)} *CHO$<br>$\xrightarrow{+ (H^+ + e^-)} *CH_2O \xrightarrow{+ (H^+ + e^-)} *CH_3O \xrightarrow{+ (H^+ + e^-)} *CH_3OH$                                                                                        | $O_1C_1B_{C_2O_1}^1$                                | -0.95              |
| 67    | $*CO_2 \xrightarrow{+ (H^+ + e^-)} *COOH \xrightarrow{+ (H^+ + e^-)} *HCOOH \xrightarrow[+ *OH]{+ (H^+ + e^-)} *CHO$<br>$\xrightarrow{+ (H^+ + e^-)} *HCOH \xrightarrow{+ (H^+ + e^-)} *CH_2OH \xrightarrow{+ (H^+ + e^-)} *CH_3OH$                                                                                        | $O_1C_1B_{O_1C_2}^1$                                | -1.78              |
| 68    | $*CO_2 \xrightarrow{+ (H^+ + e^-)} *COOH \xrightarrow{+ (H^+ + e^-)} *COHOH \xrightarrow{+ (H^+ + e^-)} *HCOHOH$<br>$\xrightarrow{+ (H^+ + e^-)} *HOCH_2OH \xrightarrow[+ *OH]{+ (H^+ + e^-)} *CH_3OH$                                                                                                                     | $O_2C_3B^3$                                         | -1.22              |
| 69    | $*CO_2 \xrightarrow{+ (H^+ + e^-)} *COOH \xrightarrow{+ (H^+ + e^-)} *COHOH \xrightarrow{+ (H^+ + e^-)} *HCOHOH$<br>$\xrightarrow{+ (H^+ + e^-)} *HOCH_2OH \xrightarrow[+ *OH]{+ (H^+ + e^-)} *CH_2OH \xrightarrow{+ (H^+ + e^-)} *CH_3OH$                                                                                 | $O_2C_2B_{C_1}^1$                                   | -1.22              |
| 70    | $*CO_2 \xrightarrow{+ (H^+ + e^-)} *COOH \xrightarrow{+ (H^+ + e^-)} *COHOH \xrightarrow{+ (H^+ + e^-)} *HCOHOH$<br>$\xrightarrow[+ *OH]{+ (H^+ + e^-)} *CH_2OH \xrightarrow{+ (H^+ + e^-)} *CH_3OH$                                                                                                                       | $O_2C_2B_{C_1}^3$                                   | -1.22              |
| 71    | $*CO_2 \xrightarrow{+ (H^+ + e^-)} *COOH \xrightarrow{+ (H^+ + e^-)} *COHOH \xrightarrow{+ (H^+ + e^-)} *HCOHOH$<br>$\xrightarrow[+ *OH]{+ (H^+ + e^-)} *HCOH \xrightarrow{+ (H^+ + e^-)} *CH_2OH \xrightarrow{+ (H^+ + e^-)} *CH_3OH$                                                                                     | $O_2C_1B_{C_2}^1$                                   | -1.22              |
| 72    | $*CO_2 \xrightarrow{+ (H^+ + e^-)} *COOH \xrightarrow{+ (H^+ + e^-)} *COHOH \xrightarrow[+ *OH]{+ (H^+ + e^-)} *HCOH$<br>$\xrightarrow{+ (H^+ + e^-)} *CH_2OH \xrightarrow{+ (H^+ + e^-)} *CH_3OH$                                                                                                                         | $O_2C_1B_{C_2}^3$                                   | -1.22              |
| 73    | $*CO_2 \xrightarrow{+ (H^+ + e^-)} *COOH \xrightarrow{+ (H^+ + e^-)} *COHOH \xrightarrow[+ *OH]{+ (H^+ + e^-)} *COH$<br>$\xrightarrow{+ (H^+ + e^-)} *HCOH \xrightarrow{+ (H^+ + e^-)} *CH_2OH \xrightarrow{+ (H^+ + e^-)} *CH_3OH$                                                                                        | $O_2B_{C_3}^1$                                      | -1.22              |
| 74    | $*CO_2 \xrightarrow{+ (H^+ + e^-)} *COOH \xrightarrow[+ *OH]{+ (H^+ + e^-)} *CHO \xrightarrow{+ (H^+ + e^-)} *CH_2O$<br>$\xrightarrow{+ (H^+ + e^-)} *CH_2OH \xrightarrow{+ (H^+ + e^-)} *CH_3OH$                                                                                                                          | $O_1C_1B_{C_1O_1C_1}^3$                             | -0.81              |
| 75    | $*CO_2 \xrightarrow{+ (H^+ + e^-)} *COOH \xrightarrow[+ *OH]{+ (H^+ + e^-)} *CHO \xrightarrow{+ (H^+ + e^-)} *CH_2O$<br>$\xrightarrow{+ (H^+ + e^-)} *CH_3O \xrightarrow{+ (H^+ + e^-)} *CH_3OH$                                                                                                                           | $O_1C_1B_{C_2O_1}^3$                                | -0.81              |
| 76    | $*CO_2 \xrightarrow{+ (H^+ + e^-)} *COOH \xrightarrow[+ *OH]{+ (H^+ + e^-)} *CHO \xrightarrow{+ (H^+ + e^-)} *HCOH$<br>$\xrightarrow{+ (H^+ + e^-)} *CH_2OH \xrightarrow{+ (H^+ + e^-)} *CH_3OH$                                                                                                                           | $O_1C_1B_{O_1C_2}^3$                                | -1.78              |

Continued on next page

Table S3 – Continued from previous page

| Index | Reaction path                                                                                                                                                                                                                      | Path name                   | $U_{min}$ (V) |
|-------|------------------------------------------------------------------------------------------------------------------------------------------------------------------------------------------------------------------------------------|-----------------------------|---------------|
| 77    | $^*CO_2 \xrightarrow{+(H^+ + e^-)} ^*COOH \xrightarrow[ - ^*OH]{+(H^+ + e^-)} ^*COH \xrightarrow{+(H^+ + e^-)} ^*HCOH$<br>$\xrightarrow{+(H^+ + e^-)} ^*CH_2OH \xrightarrow{+(H^+ + e^-)} ^*CH_3OH$                                | $O_2 B_{C_3}^3$             | -1.52         |
| 78    | $^*CO_2 \xrightarrow{+(H^+ + e^-)} ^*COOH \xrightarrow[ - ^*OH]{} ^*CO \xrightarrow{+(H^+ + e^-)} ^*CHO$<br>$\xrightarrow{+(H^+ + e^-)} ^*CH_2O \xrightarrow{+(H^+ + e^-)} ^*CH_2OH \xrightarrow{+(H^+ + e^-)} ^*CH_3OH$           | $O_1 B_{C_2 O_1 C_1}^1$     | -1.96         |
| 79    | $^*CO_2 \xrightarrow{+(H^+ + e^-)} ^*COOH \xrightarrow[ - ^*OH]{} ^*CO \xrightarrow{+(H^+ + e^-)} ^*CHO$<br>$\xrightarrow{+(H^+ + e^-)} ^*CH_2O \xrightarrow{+(H^+ + e^-)} ^*CH_3O \xrightarrow{+(H^+ + e^-)} ^*CH_3OH$            | $O_1 B_{C_3 O_1}^1$         | -1.96         |
| 80    | $^*CO_2 \xrightarrow{+(H^+ + e^-)} ^*COOH \xrightarrow[ - ^*OH]{} ^*CO \xrightarrow{+(H^+ + e^-)} ^*CHO$<br>$\xrightarrow{+(H^+ + e^-)} ^*HCOH \xrightarrow{+(H^+ + e^-)} ^*CH_2OH \xrightarrow{+(H^+ + e^-)} ^*CH_3OH$            | $O_1 B_{C_1 O_1 C_2}^1$     | -1.96         |
| 81    | $^*CO_2 \xrightarrow{+(H^+ + e^-)} ^*COOH \xrightarrow[ - ^*OH]{} ^*CO \xrightarrow{+(H^+ + e^-)} ^*COH$<br>$\xrightarrow{+(H^+ + e^-)} ^*HCOH \xrightarrow{+(H^+ + e^-)} ^*CH_2OH \xrightarrow{+(H^+ + e^-)} ^*CH_3OH$            | $O_1 B_{O_1 C_3}^1$         | -1.96         |
| 82    | $^*CO_2 \xrightarrow{+(H^+ + e^-)} ^*HCOO \xrightarrow{+(H^+ + e^-)} ^*HCOOH \xrightarrow{+(H^+ + e^-)} ^*OCH_2OH$<br>$\xrightarrow{+(H^+ + e^-)} ^*HOCH_2OH \xrightarrow[ - ^*OH]{+(H^+ + e^-)} ^*CH_3OH$                         | $C_1 O_1 C_1 O_1 C_1 B^3$   | -0.18         |
| 83    | $^*CO_2 \xrightarrow{+(H^+ + e^-)} ^*HCOO \xrightarrow{+(H^+ + e^-)} ^*HCOOH \xrightarrow{+(H^+ + e^-)} ^*OCH_2OH$<br>$\xrightarrow{+(H^+ + e^-)} ^*HOCH_2OH \xrightarrow[ - ^*OH]{} ^*CH_2OH \xrightarrow{+(H^+ + e^-)} ^*CH_3OH$ | $C_1 O_1 C_1 O_1 B_{C_1}^1$ | -0.18         |
| 84    | $^*CO_2 \xrightarrow{+(H^+ + e^-)} ^*HCOO \xrightarrow{+(H^+ + e^-)} ^*HCOOH \xrightarrow{+(H^+ + e^-)} ^*OCH_2OH$<br>$\xrightarrow[ - ^*OH]{+(H^+ + e^-)} ^*CH_2OH \xrightarrow{+(H^+ + e^-)} ^*CH_3OH$                           | $C_1 O_1 C_1 O_1 B_{C_1}^3$ | -0.18         |
| 85    | $^*CO_2 \xrightarrow{+(H^+ + e^-)} ^*HCOO \xrightarrow{+(H^+ + e^-)} ^*HCOOH \xrightarrow{+(H^+ + e^-)} ^*OCH_2OH$<br>$\xrightarrow[ - ^*OH]{+(H^+ + e^-)} ^*CH_3O \xrightarrow{+(H^+ + e^-)} ^*CH_3OH$                            | $C_1 O_1 C_2 B_{O_1}^3$     | -0.18         |
| 86    | $^*CO_2 \xrightarrow{+(H^+ + e^-)} ^*HCOO \xrightarrow{+(H^+ + e^-)} ^*HCOOH \xrightarrow{+(H^+ + e^-)} ^*OCH_2OH$<br>$\xrightarrow[ - ^*OH]{} ^*CH_2O \xrightarrow{+(H^+ + e^-)} ^*CH_2OH \xrightarrow{+(H^+ + e^-)} ^*CH_3OH$    | $C_1 O_1 C_1 B_{O_1 C_1}^1$ | -0.18         |
| 87    | $^*CO_2 \xrightarrow{+(H^+ + e^-)} ^*HCOO \xrightarrow{+(H^+ + e^-)} ^*HCOOH \xrightarrow{+(H^+ + e^-)} ^*OCH_2OH$<br>$\xrightarrow[ - ^*OH]{} ^*CH_2O \xrightarrow{+(H^+ + e^-)} ^*CH_3O \xrightarrow{+(H^+ + e^-)} ^*CH_3OH$     | $C_1 O_1 C_1 B_{C_1 O_1}^1$ | -0.18         |
| 88    | $^*CO_2 \xrightarrow{+(H^+ + e^-)} ^*HCOO \xrightarrow{+(H^+ + e^-)} ^*HCOOH \xrightarrow{+(H^+ + e^-)} ^*HCOHOH$<br>$\xrightarrow{+(H^+ + e^-)} ^*HOCH_2OH \xrightarrow[ - ^*OH]{+(H^+ + e^-)} ^*CH_3OH$                          | $C_1 O_2 C_2 B^3$           | -1.05         |
| 89    | $^*CO_2 \xrightarrow{+(H^+ + e^-)} ^*HCOO \xrightarrow{+(H^+ + e^-)} ^*HCOOH \xrightarrow{+(H^+ + e^-)} ^*HCOHOH$<br>$\xrightarrow{+(H^+ + e^-)} ^*HOCH_2OH \xrightarrow[ - ^*OH]{} ^*CH_2OH \xrightarrow{+(H^+ + e^-)} ^*CH_3OH$  | $C_1 O_2 C_1 B_{C_1}^1$     | -1.05         |
| 90    | $^*CO_2 \xrightarrow{+(H^+ + e^-)} ^*HCOO \xrightarrow{+(H^+ + e^-)} ^*HCOOH \xrightarrow{+(H^+ + e^-)} ^*HCOHOH$<br>$\xrightarrow[ - ^*OH]{+(H^+ + e^-)} ^*CH_2OH \xrightarrow{+(H^+ + e^-)} ^*CH_3OH$                            | $C_1 O_2 C_1 B_{C_1}^3$     | -1.05         |
| 91    | $^*CO_2 \xrightarrow{+(H^+ + e^-)} ^*HCOO \xrightarrow{+(H^+ + e^-)} ^*HCOOH \xrightarrow{+(H^+ + e^-)} ^*HCOHOH$<br>$\xrightarrow[ - ^*OH]{} ^*HCOH \xrightarrow{+(H^+ + e^-)} ^*CH_2OH \xrightarrow{+(H^+ + e^-)} ^*CH_3OH$      | $C_1 O_2 B_{C_2}^1$         | -1.05         |
| 92    | $^*CO_2 \xrightarrow{+(H^+ + e^-)} ^*HCOO \xrightarrow{+(H^+ + e^-)} ^*HCOOH \xrightarrow[ - ^*OH]{+(H^+ + e^-)} ^*CH_2O$<br>$\xrightarrow{+(H^+ + e^-)} ^*CH_2OH \xrightarrow{+(H^+ + e^-)} ^*CH_3OH$                             | $C_1 O_1 C_1 B_{O_1 C_1}^3$ | -0.18         |
| 93    | $^*CO_2 \xrightarrow{+(H^+ + e^-)} ^*HCOO \xrightarrow{+(H^+ + e^-)} ^*HCOOH \xrightarrow[ - ^*OH]{+(H^+ + e^-)} ^*CH_2O$                                                                                                          |                             |               |

Continued on next page

Table S3 – Continued from previous page

| Index | Reaction path                                                                                                                                                                                                                     | Path name               | $U_{min}$ (V) |
|-------|-----------------------------------------------------------------------------------------------------------------------------------------------------------------------------------------------------------------------------------|-------------------------|---------------|
| 94    | $\xrightarrow{+(H^+ + e^-)} *CH_3O \xrightarrow{+(H^+ + e^-)} *CH_3OH$<br>$*CO_2 \xrightarrow{+(H^+ + e^-)} *HCOO \xrightarrow{+(H^+ + e^-)} *HCOOH \xrightarrow[+ (H^+ + e^-)]{- *OH} *HCOH$                                     | $C_1O_1C_1B_{C_1O_1}^3$ | -0.18         |
| 95    | $\xrightarrow{+(H^+ + e^-)} *CH_2OH \xrightarrow{+(H^+ + e^-)} *CH_3OH$<br>$*CO_2 \xrightarrow{+(H^+ + e^-)} *HCOO \xrightarrow{+(H^+ + e^-)} *HCOOH \xrightarrow{- *OH} *CHO$                                                    | $C_1O_2B_{C_2}^3$       | -0.87         |
| 96    | $\xrightarrow{+(H^+ + e^-)} *CH_2O \xrightarrow{+(H^+ + e^-)} *CH_2OH \xrightarrow{+(H^+ + e^-)} *CH_3OH$<br>$*CO_2 \xrightarrow{+(H^+ + e^-)} *HCOO \xrightarrow{+(H^+ + e^-)} *HCOOH \xrightarrow{- *OH} *CHO$                  | $C_1O_1B_{C_1O_1C_1}^1$ | -0.81         |
| 97    | $\xrightarrow{+(H^+ + e^-)} *CH_2O \xrightarrow{+(H^+ + e^-)} *CH_3O \xrightarrow{+(H^+ + e^-)} *CH_3OH$<br>$*CO_2 \xrightarrow{+(H^+ + e^-)} *HCOO \xrightarrow{+(H^+ + e^-)} *HCOOH \xrightarrow{- *OH} *CHO$                   | $C_1O_1B_{C_2O_1}^1$    | -0.81         |
| 98    | $\xrightarrow{+(H^+ + e^-)} *HCOH \xrightarrow{+(H^+ + e^-)} *CH_2OH \xrightarrow{+(H^+ + e^-)} *CH_3OH$<br>$*CO_2 \xrightarrow{+(H^+ + e^-)} *HCOO \xrightarrow{+(H^+ + e^-)} *OCH_2O \xrightarrow{+(H^+ + e^-)} *OCH_2OH$       | $C_1O_1B_{O_1C_2}^1$    | -1.78         |
| 99    | $\xrightarrow{+(H^+ + e^-)} *HOCH_2OH \xrightarrow[+ (H^+ + e^-)]{- *OH} *CH_3OH$<br>$*CO_2 \xrightarrow{+(H^+ + e^-)} *HCOO \xrightarrow{+(H^+ + e^-)} *OCH_2O \xrightarrow{+(H^+ + e^-)} *OCH_2OH$                              | $C_2O_2C_1B^3$          | -1.01         |
| 100   | $\xrightarrow{+(H^+ + e^-)} *HOCH_2OH \xrightarrow{- *OH} *CH_2OH \xrightarrow{+(H^+ + e^-)} *CH_3OH$<br>$*CO_2 \xrightarrow{+(H^+ + e^-)} *HCOO \xrightarrow{+(H^+ + e^-)} *OCH_2O \xrightarrow{+(H^+ + e^-)} *OCH_2OH$          | $C_2O_2B_{C_1}^1$       | -1.01         |
| 101   | $\xrightarrow{+(H^+ + e^-)} *CH_2OH \xrightarrow{+(H^+ + e^-)} *CH_3OH$<br>$*CO_2 \xrightarrow{+(H^+ + e^-)} *HCOO \xrightarrow{+(H^+ + e^-)} *OCH_2O \xrightarrow{+(H^+ + e^-)} *OCH_2OH$                                        | $C_2O_2B_{C_1}^3$       | -1.01         |
| 102   | $\xrightarrow{+(H^+ + e^-)} *CH_3O \xrightarrow{+(H^+ + e^-)} *CH_3OH$<br>$*CO_2 \xrightarrow{+(H^+ + e^-)} *HCOO \xrightarrow{+(H^+ + e^-)} *OCH_2O \xrightarrow{+(H^+ + e^-)} *OCH_2OH$                                         | $C_2O_1C_1B_{O_1}^3$    | -1.01         |
| 103   | $\xrightarrow{+(H^+ + e^-)} *CH_2O \xrightarrow{+(H^+ + e^-)} *CH_2OH \xrightarrow{+(H^+ + e^-)} *CH_3OH$<br>$*CO_2 \xrightarrow{+(H^+ + e^-)} *HCOO \xrightarrow{+(H^+ + e^-)} *OCH_2O \xrightarrow{+(H^+ + e^-)} *OCH_2OH$      | $C_2O_1B_{O_1C_1}^1$    | -1.01         |
| 104   | $\xrightarrow{+(H^+ + e^-)} *CH_2O \xrightarrow{+(H^+ + e^-)} *CH_3O \xrightarrow{+(H^+ + e^-)} *CH_3OH$<br>$*CO_2 \xrightarrow{+(H^+ + e^-)} *HCOO \xrightarrow{+(H^+ + e^-)} *OCH_2O \xrightarrow[+ (H^+ + e^-)]{- *OH} *CH_2O$ | $C_2O_1B_{C_1O_1}^1$    | -1.01         |
| 105   | $\xrightarrow{+(H^+ + e^-)} *CH_2OH \xrightarrow{+(H^+ + e^-)} *CH_3OH$<br>$*CO_2 \xrightarrow{+(H^+ + e^-)} *HCOO \xrightarrow{+(H^+ + e^-)} *OCH_2O \xrightarrow[+ (H^+ + e^-)]{- *OH} *CH_2O$                                  | $C_2O_1B_{O_1C_1}^3$    | -1.01         |
| 106   | $\xrightarrow{+(H^+ + e^-)} *CH_3O \xrightarrow{+(H^+ + e^-)} *CH_3OH$<br>$*CO_2 \xrightarrow{+(H^+ + e^-)} *HCOO \xrightarrow[+ (H^+ + e^-)]{- *OH} *CHO \xrightarrow{+(H^+ + e^-)} *CH_2O$                                      | $C_2O_1B_{C_1O_1}^3$    | -1.01         |
| 107   | $\xrightarrow{+(H^+ + e^-)} *CH_2OH \xrightarrow{+(H^+ + e^-)} *CH_3OH$<br>$*CO_2 \xrightarrow{+(H^+ + e^-)} *HCOO \xrightarrow[+ (H^+ + e^-)]{- *OH} *CHO \xrightarrow{+(H^+ + e^-)} *CH_2O$                                     | $C_1O_1B_{C_1O_1C_1}^3$ | -0.81         |
| 108   | $\xrightarrow{+(H^+ + e^-)} *CH_3O \xrightarrow{+(H^+ + e^-)} *CH_3OH$<br>$*CO_2 \xrightarrow{+(H^+ + e^-)} *HCOO \xrightarrow[+ (H^+ + e^-)]{- *OH} *CHO \xrightarrow{+(H^+ + e^-)} *CH_2O$                                      | $C_1O_1B_{C_2O_1}^3$    | -0.81         |
| 109   | $\xrightarrow{+(H^+ + e^-)} *CH_2OH \xrightarrow{+(H^+ + e^-)} *CH_3OH$<br>$*CO_2 \xrightarrow{+(H^+ + e^-)} *HCOO \xrightarrow[+ (H^+ + e^-)]{- *OH} *CHO \xrightarrow{+(H^+ + e^-)} *HCOH$                                      | $C_1O_1B_{O_1C_2}^3$    | -1.78         |
| 110   | $\xrightarrow{+(H^+ + e^-)} *CH_2OH \xrightarrow{+(H^+ + e^-)} *CH_3OH$<br>$*CO_2 \xrightarrow[+ (H^+ + e^-)]{- *OH} *CO \xrightarrow{+(H^+ + e^-)} *CHO \xrightarrow{+(H^+ + e^-)} *CH_2O$                                       | $O_1B_{C_2O_1C_1}^3$    | -1.20         |

Continued on next page

Table S3 – Continued from previous page

| Index | Reaction path                                                                                                                                                                      | Path name               | $U_{min}$ (V) |
|-------|------------------------------------------------------------------------------------------------------------------------------------------------------------------------------------|-------------------------|---------------|
| 110   | $*CO_2 \xrightarrow{+(H^+ + e^-)} *CO \xrightarrow{-(OH)} *CHO \xrightarrow{+(H^+ + e^-)} *CH_2O$<br>$\xrightarrow{+(H^+ + e^-)} *CH_3O \xrightarrow{+(H^+ + e^-)} *CH_3OH$        | $O_1 B_{C_3 O_1}^3$     | -1.20         |
| 111   | $*CO_2 \xrightarrow{+(H^+ + e^-)} *CO \xrightarrow{-(OH)} *CHO \xrightarrow{+(H^+ + e^-)} *HCOH$<br>$\xrightarrow{+(H^+ + e^-)} *CH_2OH \xrightarrow{+(H^+ + e^-)} *CH_3OH$        | $O_1 B_{C_1 O_1 C_2}^3$ | -1.78         |
| 112   | $*CO_2 \xrightarrow{+(H^+ + e^-)} *CO \xrightarrow{-(OH)} *COH \xrightarrow{+(H^+ + e^-)} *HCOH$<br>$\xrightarrow{+(H^+ + e^-)} *CH_2OH \xrightarrow{+(H^+ + e^-)} *CH_3OH$        | $O_1 B_{O_1 C_3}^3$     | -1.20         |
| 113   | $*CO_2 \xrightarrow{+(H^+ + e^-)} *COOH \xrightarrow{+(H^+ + e^-)} *HCOOH \xrightarrow{+(H^+ + e^-)} *OCH_2OH$<br>$\xrightarrow{+(H^+ + e^-)} *CH_3OH$                             | $O_1 C_3 C^3$           | -0.95         |
| 114   | $*CO_2 \xrightarrow{+(H^+ + e^-)} *COOH \xrightarrow{+(H^+ + e^-)} *HCOOH \xrightarrow{+(H^+ + e^-)} *OCH_2OH$<br>$\xrightarrow{-(O)} *CH_2OH \xrightarrow{+(H^+ + e^-)} *CH_3OH$  | $O_1 C_2 C_{C_1}^1$     | -0.95         |
| 115   | $*CO_2 \xrightarrow{+(H^+ + e^-)} *COOH \xrightarrow{+(H^+ + e^-)} *HCOOH \xrightarrow{-(O)} *CH_2OH$<br>$\xrightarrow{+(H^+ + e^-)} *CH_3OH$                                      | $O_1 C_2 C_{C_1}^3$     | -0.95         |
| 116   | $*CO_2 \xrightarrow{+(H^+ + e^-)} *COOH \xrightarrow{+(H^+ + e^-)} *HCOOH \xrightarrow{-(O)} *HCOH$<br>$\xrightarrow{+(H^+ + e^-)} *CH_2OH \xrightarrow{+(H^+ + e^-)} *CH_3OH$     | $O_1 C_1 C_{C_2}^1$     | -1.41         |
| 117   | $*CO_2 \xrightarrow{+(H^+ + e^-)} *COOH \xrightarrow{-(O)} *HCOH \xrightarrow{+(H^+ + e^-)} *CH_2OH$<br>$\xrightarrow{+(H^+ + e^-)} *CH_3OH$                                       | $O_1 C_1 C_{C_2}^3$     | -2.36         |
| 118   | $*CO_2 \xrightarrow{+(H^+ + e^-)} *COOH \xrightarrow{-(O)} *COH \xrightarrow{+(H^+ + e^-)} *HCOH$<br>$\xrightarrow{+(H^+ + e^-)} *CH_2OH \xrightarrow{+(H^+ + e^-)} *CH_3OH$       | $O_1 C_{C_3}^1$         | -2.06         |
| 119   | $*CO_2 \xrightarrow{+(H^+ + e^-)} *HCOO \xrightarrow{+(H^+ + e^-)} *HCOOH \xrightarrow{+(H^+ + e^-)} *OCH_2OH$<br>$\xrightarrow{-(O)} *CH_3OH$                                     | $C_1 O_1 C_2 C^3$       | -0.18         |
| 120   | $*CO_2 \xrightarrow{+(H^+ + e^-)} *HCOO \xrightarrow{+(H^+ + e^-)} *HCOOH \xrightarrow{+(H^+ + e^-)} *OCH_2OH$<br>$\xrightarrow{-(O)} *CH_2OH \xrightarrow{+(H^+ + e^-)} *CH_3OH$  | $C_1 O_1 C_1 C_{C_1}^1$ | -0.18         |
| 121   | $*CO_2 \xrightarrow{+(H^+ + e^-)} *HCOO \xrightarrow{+(H^+ + e^-)} *HCOOH \xrightarrow{-(O)} *CH_2OH$<br>$\xrightarrow{+(H^+ + e^-)} *CH_3OH$                                      | $C_1 O_1 C_1 C_{C_1}^3$ | -0.18         |
| 122   | $*CO_2 \xrightarrow{+(H^+ + e^-)} *HCOO \xrightarrow{+(H^+ + e^-)} *HCOOH \xrightarrow{-(O)} *HCOH$<br>$\xrightarrow{+(H^+ + e^-)} *CH_2OH \xrightarrow{+(H^+ + e^-)} *CH_3OH$     | $C_1 O_1 C_{C_2}^1$     | -1.41         |
| 123   | $*CO_2 \xrightarrow{+(H^+ + e^-)} *HCOO \xrightarrow{+(H^+ + e^-)} *OCH_2O \xrightarrow{+(H^+ + e^-)} *OCH_2OH$<br>$\xrightarrow{-(O)} *CH_3OH$                                    | $C_2 O_1 C_1 C^3$       | -1.01         |
| 124   | $*CO_2 \xrightarrow{+(H^+ + e^-)} *HCOO \xrightarrow{+(H^+ + e^-)} *OCH_2O \xrightarrow{+(H^+ + e^-)} *OCH_2OH$<br>$\xrightarrow{-(O)} *CH_2OH \xrightarrow{+(H^+ + e^-)} *CH_3OH$ | $C_2 O_1 C_{C_1}^1$     | -1.01         |
| 125   | $*CO_2 \xrightarrow{+(H^+ + e^-)} *HCOO \xrightarrow{+(H^+ + e^-)} *OCH_2O \xrightarrow{-(O)} *CH_3O$<br>$\xrightarrow{+(H^+ + e^-)} *CH_3OH$                                      | $C_3 C_{O_1}^3$         | -1.01         |
| 126   | $*CO_2 \xrightarrow{+(H^+ + e^-)} *HCOO \xrightarrow{+(H^+ + e^-)} *OCH_2O \xrightarrow{-(O)} *CH_2O$                                                                              |                         |               |

Continued on next page



Table S3 – Continued from previous page

| Index | Reaction path                                                                                                                                                                                | Path name               | $U_{min}$ (V) |
|-------|----------------------------------------------------------------------------------------------------------------------------------------------------------------------------------------------|-------------------------|---------------|
| 127   | $\xrightarrow{+(H^+ + e^-)} *CH_2OH \xrightarrow{+(H^+ + e^-)} *CH_3OH$<br>$*CO_2 \xrightarrow{+(H^+ + e^-)} *HCOO \xrightarrow{+(H^+ + e^-)} *OCH_2O \xrightarrow[-*O]{} *CH_2O$            | $C_2 C_{O_1}^1 C_1$     | -1.01         |
| 128   | $\xrightarrow{+(H^+ + e^-)} *CH_3O \xrightarrow{+(H^+ + e^-)} *CH_3OH$<br>$*CO_2 \xrightarrow{+(H^+ + e^-)} *HCOO \xrightarrow[-*O]{+(H^+ + e^-)} *CH_2O \xrightarrow{+(H^+ + e^-)} *CH_2OH$ | $C_2 C_{C_1 O_1}^1$     | -1.01         |
| 129   | $\xrightarrow{+(H^+ + e^-)} *CH_3OH$<br>$*CO_2 \xrightarrow{+(H^+ + e^-)} *HCOO \xrightarrow[-*O]{+(H^+ + e^-)} *CH_2O \xrightarrow{+(H^+ + e^-)} *CH_3O$                                    | $C_2 C_{O_1}^3 C_1$     | -0.45         |
| 130   | $\xrightarrow{+(H^+ + e^-)} *CH_3OH$<br>$*CO_2 \xrightarrow{+(H^+ + e^-)} *HCOO \xrightarrow[-*O]{} *CHO \xrightarrow{+(H^+ + e^-)} *CH_2O$                                                  | $C_2 C_{C_1 O_1}^3$     | -0.45         |
| 131   | $\xrightarrow{+(H^+ + e^-)} *CH_2OH \xrightarrow{+(H^+ + e^-)} *CH_3OH$<br>$*CO_2 \xrightarrow{+(H^+ + e^-)} *HCOO \xrightarrow[-*O]{} *CHO \xrightarrow{+(H^+ + e^-)} *CH_2O$               | $C_1 C_{C_1 O_1 C_1}^1$ | -0.81         |
| 132   | $\xrightarrow{+(H^+ + e^-)} *CH_3O \xrightarrow{+(H^+ + e^-)} *CH_3OH$<br>$*CO_2 \xrightarrow{+(H^+ + e^-)} *HCOO \xrightarrow[-*O]{} *CHO \xrightarrow{+(H^+ + e^-)} *HCOH$                 | $C_1 C_{C_2 O_1}^1$     | -0.81         |
| 133   | $\xrightarrow{+(H^+ + e^-)} *CH_2OH \xrightarrow{+(H^+ + e^-)} *CH_3OH$<br>$*CO_2 \xrightarrow[-*O]{+(H^+ + e^-)} *CHO \xrightarrow{+(H^+ + e^-)} *CH_2O \xrightarrow{+(H^+ + e^-)} *CH_2OH$ | $C_1 C_{O_1 C_2}^1$     | -1.78         |
| 134   | $\xrightarrow{+(H^+ + e^-)} *CH_3OH$<br>$*CO_2 \xrightarrow[-*O]{+(H^+ + e^-)} *CHO \xrightarrow{+(H^+ + e^-)} *CH_2O \xrightarrow{+(H^+ + e^-)} *CH_3O$                                     | $C_1 C_{C_1 O_1 C_1}^3$ | -0.81         |
| 135   | $\xrightarrow{+(H^+ + e^-)} *CH_3OH$<br>$*CO_2 \xrightarrow[-*O]{+(H^+ + e^-)} *CHO \xrightarrow{+(H^+ + e^-)} *HCOH \xrightarrow{+(H^+ + e^-)} *CH_2OH$                                     | $C_1 C_{C_2 O_1}^3$     | -0.81         |
| 136   | $\xrightarrow{+(H^+ + e^-)} *CH_3OH$<br>$*CO_2 \xrightarrow[-*O]{} *CO \xrightarrow{+(H^+ + e^-)} *CHO \xrightarrow{+(H^+ + e^-)} *CH_2O$                                                    | $C_1 C_{O_1 C_2}^3$     | -1.78         |
| 137   | $\xrightarrow{+(H^+ + e^-)} *CH_2OH \xrightarrow{+(H^+ + e^-)} *CH_3OH$<br>$*CO_2 \xrightarrow[-*O]{} *CO \xrightarrow{+(H^+ + e^-)} *CHO \xrightarrow{+(H^+ + e^-)} *CH_2O$                 | $C_1 C_{C_2 O_1 C_1}^1$ | -1.73         |
| 138   | $\xrightarrow{+(H^+ + e^-)} *CH_3O \xrightarrow{+(H^+ + e^-)} *CH_3OH$<br>$*CO_2 \xrightarrow[-*O]{} *CO \xrightarrow{+(H^+ + e^-)} *CHO \xrightarrow{+(H^+ + e^-)} *HCOH$                   | $C_1 C_{C_3 O_1}^1$     | -1.73         |
| 139   | $\xrightarrow{+(H^+ + e^-)} *CH_2OH \xrightarrow{+(H^+ + e^-)} *CH_3OH$<br>$*CO_2 \xrightarrow[-*O]{} *CO \xrightarrow{+(H^+ + e^-)} *COH \xrightarrow{+(H^+ + e^-)} *HCOH$                  | $C_1 C_{C_1 O_1 C_2}^1$ | -1.78         |
|       | $\xrightarrow{+(H^+ + e^-)} *CH_2OH \xrightarrow{+(H^+ + e^-)} *CH_3OH$                                                                                                                      | $C_1 C_{O_1 C_3}^1$     | -1.73         |



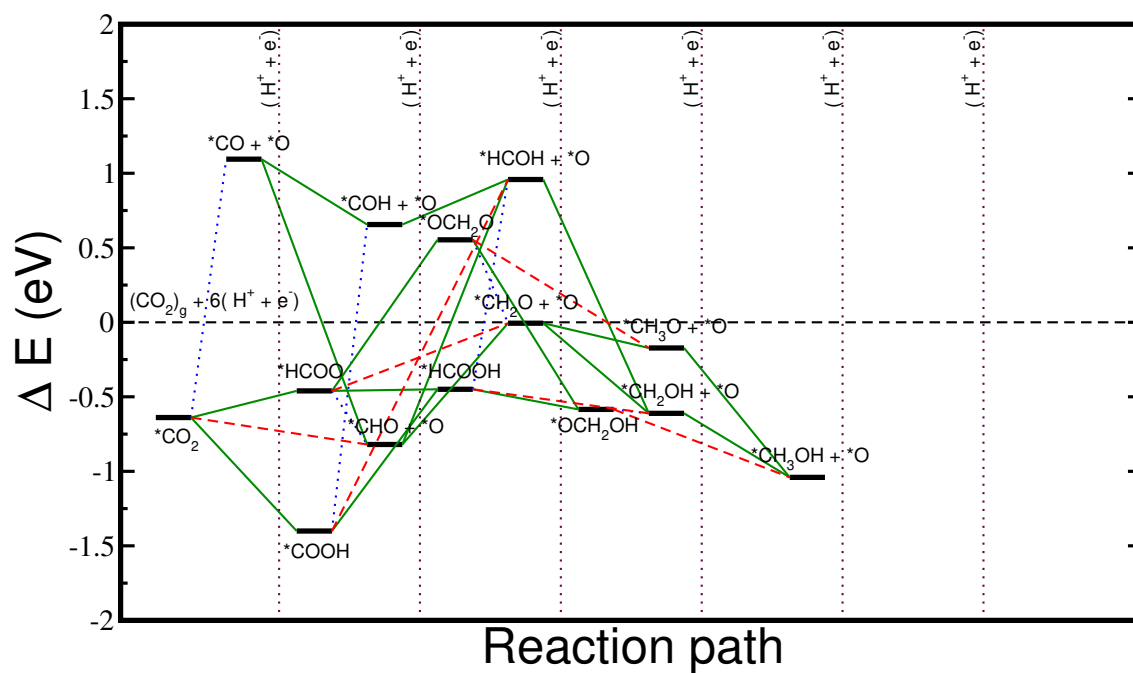

Figure S5: Mechanism type C: The free energy diagram of electrocatalytic reduction of CO<sub>2</sub> to CH<sub>3</sub>OH on hematite surface at 0 V (RHE). The vertical lines represents the proton-electron transfer step. The colour code is same as Figure-S2.
